# Supplementary material for: Monitoring of Selected Health Indicators in Children Living in a Copper Mine Development Area in Northwestern Zambia
Source: Int J Environ Res Public Health. 2017 Mar 19;14(3):315. doi: 10.3390/ijerph14030315 (PMC5369151; doi:10.3390/ijerph14030315)
Supplement: Supplementary file 1 [file ijerph-14-00315-s001.xlsx]

## Sheet: survey
type	name	label	label::Lunda	hint	relevant	constraint	constraint_message	required	appearance	default	read_only	calculation	label::zambia	hint::zambia	image::english	media::audio::chinese	media::video
start	start
end	end
today	today
deviceid	deviceid
select_one yes_no	criteria	Are the inclusion criteria for the household fulfilled?	Are the inclusion criteria for the household fulfilled?	The inclusion criteria are: i) presence of a mother; ii) presence of at least one child under the age of 5 years; and iii) residence to the area for at least one month
note	title	Questionnaire Follow-Up Health Survey Trident Project	Questionnaire Follow-Up Health Survey Trident Project	Happy interview!!
begin group	s0	0 Identification
datetime	datestart_survey	Interview date and start time	Interview start time					yes
select_one ss	ss	Sentinel site	Sentinel site					yes
integer	hh	Household number	Household number			. <=99		yes
select_one interviewer	interviewer	Interviewer name	Interviewer name					yes
select_one consent	consent	Did the household head give consent to participate in the study and was the consent form signed?	Did the household head give consent to participate in the study and was the consent form signed?					yes
end group
begin group	s				not(selected(${consent}, '2'))
begin group	s1	1 Household questionnaire	Malwihu amuchisaka	This section needs to be completed with the household head and/or the mother
text	hh_name	Name of the household head	Ijina da mwiniitala					yes
begin group	hh_age								field-list
integer	hh_age1	Age of the household head:	Ijina damukulumpi wetala, Yaka ya mwiniitala (years)			. <=99
select_one hh_age2	hh_age2	If no age precision:	Kutong’ozhoka yaka nehi:
end group
select_one hh_sex	hh_sex	Sex of the household head	Mumbanda Iyala					yes
select_one hh_religion	hh_religion	Religion of the household head	Kwitiya cha mwiniitala					yes
text	hh_religiono	Which other religion?	Which other religion?		selected(${hh_religion}, '6')
select_one hh_ethnie	hh_ethnie	Ethnic group of the household head	Muchidi wa mwiniitala:					yes
text	hh_ethnieo	Which ethnie or country?	Neyi yikwawu kwitung’anyi hela muchidi?		selected(${hh_ethnie}, '9')
select_one hh_education	hh_education	Educational attainment of the household head	Kutang’a cha mwiniitala					yes
integer	adults	Number of adults above 15 years living in the household	Kuvula kwawakulumpi ashakamang’a mwitala anabadiki yaka ikumi dimu nayitanu?	Including the household head.		. <=15		yes
integer	children	Number of children aged 5-14 years living in the household	Kuvula chawanyana ashakamang’a mwitala anashiki hayaka itanu nakushika ikumi dimu nayiwana?			. <=15		yes
integer	school_att	Of the children aged 5-14 years, how many are currently attending school?	Anyana ang’ahi adi nayaka itanu nakushika ikumi dimu nayiwana ang’ahi anakutang’a shikola chayinu mpinji?		${children} > 0	. <=15		yes
integer	u5	Number of children aged 0-5 years living in the household	Anyana anakushakama mwitala anashiki yaka yamukunkulu nakushika yitanu?			. <=15		yes
begin group	res								field-list
note	res	Since how many years and months are you living in the current location?	Kuleha cha mpinji yakushakama helung’a?	location = the village
integer	resyears	Number of years:	Yaka:	Enter 0 ('zero') if necessary				yes
integer	resmonths	Number of months:	Tukweji:			. <=11
end group
select_one respast	respast	Since you arrived here in the last 5 years, where did you come from?	Neyi mwenzhili nakutung’ila kunu yaka itanu inahiti, hatachi mwading’i kudihi?		${resyears} <= 5			yes
text	respasto1	Which other area/place in Zambia did you come from?	Which other area/place did you come from?		selected(${respast}, '7')
text	respasto2	Which other country did you come from?	Itung’anyi dikwawu kuwafumini?		selected(${respast}, '9')
select_multiple relocation	relocation	What was/were the reason(s) to migrate into this village?	Nsang’uinyi yaleteli mwinzhi nakutung’ila kunu?	Multiple answers possible.	${resyears} <= 5			yes
text	relocationo	What other reason?	What other reason?		selected(${relocation}, '11')
select_one resettle1	resettle1	Were you resettled for the Project (Trident, Kalumbila mine, KML)?	Ayileteli kunu aka mine tahindi?		not(selected(${relocation}, '8'))			yes
select_one resettle2	resettle2	Where did you reside before (the resettlement)?	Mwahandileng’a kudi hatachi?		selected(${resettle1}, '1') or selected(${relocation}, '8')
text	resettle3	Which other place?	Which other place?		selected(${resettle2}, '6')
select_one emp1	emp1	How many adult members of this household (including the HH head) are currently employed?	Antu ang’ahi muchisaka chenu kubomba nimwiniitala eng’izhawu mudimu?					yes
begin group	employer
select_one employer1	employer1	Who is the employer for the 1st household member that is employed?	Watachi muchisaka weng’ila mudimu?		(selected(${emp1}, "1")) or (selected(${emp1}, "2")) or (selected(${emp1}, "3")) or (selected(${emp1}, "4")) or (selected(${emp1}, "5")) or (selected(${emp1}, "6")) or not(selected(${emp1}, '0'))
text	employer1o	Which other employer?	Wakwing’izha mudimu mukwawu?		selected(${employer1}, '15')
select_one employer1p	employer1p	Does the person work full-time, part-time or seasonal?	Muntu wazhatang’a chikupu, chamweseka hela champinji?		(selected(${emp1}, "1")) or (selected(${emp1}, "2")) or (selected(${emp1}, "3")) or (selected(${emp1}, "4")) or (selected(${emp1}, "5")) or (selected(${emp1}, "6"))
select_one employer2	employer2	Who is the employer for the 2nd household member that is employed?	Wamuchiyedi muchisaka weng’la mudimu?		(selected(${emp1}, "2")) or (selected(${emp1}, "3")) or (selected(${emp1}, "4")) or (selected(${emp1}, "5")) or (selected(${emp1}, "6")) or not(selected(${emp1}, '0'))
text	employer2o	Which other employer?	Wakwing’izha mudimu mukwawu?		selected(${employer2}, '15')
select_one employer2p	employer2p	Does the person work full-time, part-time or seasonal?	Muntu wazhatang’a chikupu, chamweseka hela champinji?		(selected(${emp1}, "2")) or (selected(${emp1}, "3")) or (selected(${emp1}, "4")) or (selected(${emp1}, "5")) or (selected(${emp1}, "6"))
select_one employer3	employer3	Who is the employer for the 3rd household member that is employed?	Wamuchisatu muchisaka weng’la mudimu?		(selected(${emp1}, "3")) or (selected(${emp1}, "4")) or (selected(${emp1}, "5")) or (selected(${emp1}, "6")) or not(selected(${emp1}, '0'))
text	employer3o	Which other employer?	Wakwing’izha mudimu mukwawu?		selected(${employer3}, '15')
select_one employer3p	employer3p	Does the person work full-time, part-time or seasonal?	Muntu wazhatang’a chikupu, chamweseka hela champinji?		(selected(${emp1}, "3")) or (selected(${emp1}, "4")) or (selected(${emp1}, "5")) or (selected(${emp1}, "6"))
select_one employer4	employer4	Who is the employer for the 4th household member that is employed?	Wamuchiwana muchisaka weng’la mudimu?		(selected(${emp1}, "4")) or (selected(${emp1}, "5")) or (selected(${emp1}, "6")) or not(selected(${emp1}, '0'))
text	employer4o	Which other employer?	Wakwing’izha mudimu mukwawu?		selected(${employer4}, '15')
select_one employer4p	employer4p	Does the person work full-time, part-time or seasonal?	Muntu wazhatang’a chikupu, chamweseka hela champinji?		(selected(${emp1}, "4")) or (selected(${emp1}, "5")) or (selected(${emp1}, "6"))
select_one employer5	employer5	Who is the employer for the 5th household member that is employed?	Wamuchitanu muchisaka weng’la mudimu?		(selected(${emp1}, "5")) or (selected(${emp1}, "6")) or not(selected(${emp1}, '0'))
text	employer5o	Which other employer?	Wakwing’izha mudimu mukwawu?		selected(${employer5}, '15')
select_one employer5p	employer5p	Does the person work full-time, part-time or seasonal?	Muntu wazhatang’a chikupu, chamweseka hela champinji?		(selected(${emp1}, "5")) or (selected(${emp1}, "6"))
select_one employer6	employer6	Who is the employer for the 5th household member that is employed?			(selected(${emp1}, "6")) or not(selected(${emp1}, '0'))
text	employer6o	Which other employer?	Wakwing’izha mudimu mukwawu?		selected(${employer5}, '15')
select_one employer6p	employer6p	Does the person work full-time, part-time or seasonal?	Muntu wazhatang’a chikupu, chamweseka hela champinji?		(selected(${emp1}, "6"))
end group
begin group	rooms								field-list
select_one rooms	rooms	How many separate rooms do you have in your dwelling/house?	Mwitala denu mwekala tupeka tung’ahi?					yes
select_one sleep	sleep	How many rooms are used for sleeping?	Tupeka tung’ahi twakama antu?					yes
end group
begin group	srooms								field-list
integer	sleep1	How many people are usually sleeping in the first bedroom?	Antu ang’ahi akamang’a mukapeka kamu kapeka katachi?		(selected(${sleep}, "1")) or (selected(${sleep}, "2")) or (selected(${sleep}, "3")) or (selected(${sleep}, "4"))
integer	sleep2	How many people are usually sleeping in the second bedroom?	Antu ang’ahi akamang’a mukapeka kamu kapeka kamuchiyed		(selected(${sleep}, "2")) or (selected(${sleep}, "3")) or (selected(${sleep}, "4"))
integer	sleep3	How many people are usually sleeping in the third bedroom?	Antu ang’ahi akamang’a mukapeka kamu kapeka kamuchisatu?		(selected(${sleep}, "3")) or (selected(${sleep}, "4"))
integer	sleep4	How many people are usually sleeping in the forth bedroom?	Antu ang’ahi akamang’a mukapeka kamu kapeka kamuchiwana?		(selected(${sleep}, "4"))
end group
begin group	assets								field-list
select_one yes_no	assets	Does your household possess any of the following…?	Chisaka chenu chaheta inu Yuma inukutena tahindi...?	Promt all answers.					label
select_one yes_no	asset1	Agricultural land	Maha					yes	list-nolabel
select_one yes_no	asset2	Livestock	Yimuna					yes	list-nolabel
select_one yes_no	asset3	Bicycle	Nking’a					yes	list-nolabel
select_one yes_no	asset4	Electricity (mains)	Kesi kamalaiti (mains)					yes	list-nolabel
select_one yes_no	asset5	Generator	Ikina damalaiti					yes	list-nolabel
select_one yes_no	asset6	Refrigerator	Ikina dakututisha menzhi					yes	list-nolabel
select_one yes_no	asset7	Radio	Chisanji					yes	list-nolabel
select_one yes_no	asset8	Bank account	Chiswekelu cha mali					yes	list-nolabel
select_one yes_no	asset9	Solar panel	Kesi ka mutena (solar)					yes	list-nolabel
select_one yes_no	asset10	Television	Chisanji chanyevulu (TV)					yes	list-nolabel
select_one yes_no	asset11	Motorcycle	Katukutuku (Honda)					yes	list-nolabel
select_one yes_no	asset12	Clock, watch	Nkoloku					yes	list-nolabel
select_one yes_no	asset13	Cellphone, telephone	Fonyi					yes	list-nolabel
select_one yes_no	asset14	Vehicle, car, truck	Motoka					yes	list-nolabel
select_one yes_no	asset15	Carpet	Carpet					yes	list-nolabel
select_one yes_no	asset16	Internet access	Internet access					yes	list-nolabel
select_one yes_no	asset17	Iron (charcoal or electric)	Nshimbi yakukiisa nachu					yes	list-nolabel
select_one yes_no	asset18	Access to a newspaper or other form of written information	Kulanda nikutang’a dipepa da nsang’u					yes	list-nolabel
end group
select_one floor	floor	Material of the household floor:	Yumanyi idi hamaseki:	Observation only.				yes
select_one wall	wall	Material of the household wall:	Mwazatishili Yuma nyi hakutung’a itala denu:	Observation only.				yes
select_one roof	roof	Material of the household roof:	Mwazatishili Yuma nyi hakwambila itala	Observation only.				yes
select_one fuel	fuel	What type of fuel does your household mainly use for cooking?	Mwazatishang’a kesi kamuchidinyi hakuteleka?	Main fuel only.				yes
text	fuelo	Which other type of fuel?	Manzhinyi akesinyi amakwawu mwazhatishang’a?		(selected(${fuel}, '7'))
select_one cook	cook	Where is the main cooking place for your household?	Indi chinsambu chekala kudihi?					yes
text	cooko	Which other place?	Ilung’anyi dikwawu?		(selected(${cook}, '4'))
select_one energy	energy	What is the main source of energy used for lighting?	Ufuku mwazatishang’a lampi yamuchinyi?					yes
text	energyo	Which other source?	Kasuluinyi kakwawu?		(selected(${energy}, '9'))
begin group	bs	Access to basic services			field-list				field-list
select_one services	bs	How long (in minutes) does it take you to reach the nearest …	Mwasendang’a mpinji yailehi ng’ahi kushika ku…	Promt all answers.	label			yes
select_one services	tsourced	… drinking water supply in the dry season?	…kwakutehuna menzhi akunwa (hanong’a)		list-nolabel			yes
select_one services	tsourcer	… drinking water supply in the rainy season?	…kwakutehuna menzhi akunwa (mainza)		list-nolabel			yes
select_one services	tmarket	… food market?	…kwakulandila yakudya		list-nolabel			yes
select_one services	tptransport	… public transport?	…kwakukandamina nyotoka		list-nolabel			yes
select_one services	tpschool	… primary school?	…kushikola yanyanya		list-nolabel			yes
select_one services	tsschool	… secondary school?	…kushikola yeneni		list-nolabel			yes
select_one services	thf	… health clinic/post or hospital?	…kuchipateli		list-nolabel			yes
select_one services	thfvct	… centre where HIV testing and treatment is offered?	…kwapiminang’a tububu twa HIV		list-nolabel			yes
select_one services	tmps	… mobile phone signal?	…kwakuwana network ya fonyi		list-nolabel			yes
end group
select_one sourced	sourced	What is the main source of drinking water for this household in the dry season?	Mwatehunang’a kudihi menzhi akunwa mainza?	Main source only.				yes
text	sourcedo	What other source?	Kasuluinyi kakwawu?		selected(${sourced}, '9')
select_one sourcer	sourcer	What is the main source of drinking water for this household in the rainy season?	Mwatehunang’a kudihi menzhi akunwa hanong’a?	Main source only.				yes
text	sourcero	What other source?	Kasuluinyi kakwawu?		selected(${sourcer}, '9')
select_multiple wtreat	wtreat	Do you do anything to the water to make it safer to drink?	Kwekalahu Yuma yimwelang’a, hela kwinka kumenzhi akunwa kulonda abuli kuleta kukala?	Multiple answers possible.				yes
integer	wtreato	What else do you do?	What else do you do?		selected(${wtreat}, '8')
select_one toilet1	toilet1	Do you have any toilet/latrine in your household/compound?	Mukweti chimbusu hachisaka/mukala tahindi?					yes
select_one toilet2	toilet2	What type of toilet/latrine do you have?	Mukweti chimbusu chamuchilinyi?		selected(${toilet1}, '1')
text	toilet2o	What other type of toilet?	Chimbusu chamuchidinyi chikwawu?		selected(${toilet2}, '6')
select_one toilet3	toilet3	Do your children use this toilet/latrine?	Anyanenu azatishang’a chimbusu tahindi?		selected(${toilet1}, '1')
select_one toilet4	toilet4	Where do you defecate?	Neyi chimbusu kosi antu anyinyang’a kuduhi?		selected(${toilet1}, '2')
text	toilet5	Where else do you defecate?	Where else do you defecate?		selected(${toilet1}, '5')
select_one soap	soap	Do you have any soap or detergent to wash hands at home?	Mukweti njapawu (soap) yakuwelesha kumakasa hetala tahindi?	Verify by observation.				yes
select_one itn1	itn1	Does your household have any mosquito nets that can be used while sleeping?	Mukweti nyishikatena yakudibuta nachu kukanisha ng’weneni tahindi?					yes
select_multiple itn2	itn2	Why don’t you own any bed nets?	Mwabuliladi kuheta nyishikatena?	Multiple answers possible.	selected(${itn1}, '2')
integer	itn3	How many mosquito nets does your household have?	Mwekala na nyishikatena ing’ahi?		selected(${itn1}, '1')	. <=10
select_multiple itn4	itn4	Where did you get this/these bed net(s) from?	Indi nyishikatena mwaitambwili kumu kudihi?	Multiple answers possible.	selected(${itn1}, '1')
integer	int4o	Which other place did you get the bed net from?	Which other place did you get the bed net from?		selected(${itn4}, '6')
integer	itn5	Determine the number of insecticide-treated nets (ITNs) or long-lasting insecticide-treated net (LLINs) in the household	Determine the number of insecticide-treated nets (ITNs) or long-lasting insecticide-treated net (LLINs) in the household	An ITN is (1) a factory-treated net that does not require any further treatment or (2) a pre-treated net obtained within the past 12 months	selected(${itn1}, '1')	. <=10
select_one yes_no	itn6	Determine how many children under 5 years registered on the clinical sheet did sleep under the ITNs/LLINs last night and check the box on the clinical sheet if applicable! Have you checked the box on the clinical sheet?	Determine how many children under 5 years registered on the clinical sheet did sleep under the ITNs/LLINs last night and check the box on the clinical sheet if applicable! Have you checked the box on the clinical sheet?
end group
begin group	s2	2 Mother's questionnaire	2 Malwihu amukamama		not(selected(${consent}, '2'))
note	sociodemographics	Socio-demographic characteristics	Yuma yamwekeshang’a chihandilu chawantu	This section needs to be completed with the mother of at least one child under 5 years of age. Please ensure that you take the interview with the mother privately, i.e. noone else can eves drop your conversation.
begin group	agef	Age of the female respondent							field-list
integer	agef1	How old are you?	Yaka ying’ahi wudi nayu?			. <=99
select_one agef2	agef2	If no age precision:	Kutong’ozhoka yaka nehi:
end group
select_one maritalf	maritalf	What is your marital status?	Wasumbuka tahindi?					yes
select_one eduf	eduf	What is your highest education level / attainment?	Indi kushikola mwakuminini munka?					yes
select_one occupf	occupf	What is your occupation, i.e. what is the principal work you do (to generate income)?	Mwazatang’a mudimwinyi mukuhanda chenu?					yes
text	occupfo	Which other occupation?	Chikota chamudimunyi chikwawu?		selected(${occupf}, '17')
note	mch	Maternal and child health	Kuhanda chamuzhimba chamukamama na mwana
begin group	agebirth	Age at first child birth:							field-list
integer	ageb1	At what age did you have your first child?	Mwading’i nayaka ing’ahi impinji imwavwalili mwana wawedi?			. <=50
select one ageb2	ageb2	If no age precision:
end group
select_one anc1	anc1	Did you attend any antenatal care services during your last pregnancy?	Mwaileng’a nakupimisha ivumu tahindi?					yes
select_multiple anc2	anc2	Where did you attend antenatal care services?	Mwaileng’a nakupimisha ivumu kumu kudihi?		selected(${anc1}, '1')
text	anc2o	Which other institution did you go to for antenatal care services?	Ilung’anyi dikwawu kumwayili nakupimisha ivumu?		selected(${anc2}, '5')
select_one anc3	anc3	How many times did you receive antenatal care during your last pregnancy?	Mwayili nakupimisha ivumu mapampa kang’ahi?		selected(${anc1}, '1')			yes
select_one anc4	anc4	During this or your last pregnancy were you offered counselling and testing for the virus that causes HIV/AIDS?	Impinji yevumu denu ayikwashili nakupima na nsang’u yakabubu ka HIV/AIDS tahindi?					yes
select_one anc5	anc5	During this or your last pregnancy, did you take any drugs to keep you from getting malaria?	Hevumu dakukuminina ayinkeli itumbu yakukang’esha mashika (malaria) tahindi?					yes
select_one birth1	birth1	Where did you give birth to your youngest child?	Mwasampulukili kumu kudihi hevumu dankuminina?					yes
text	birth1o	Which other place did you deliver?	Ilung’anyi dikwawu mwasampukilili?		selected(${birth1}, '6')
select_one birth2	birth2	Why didn’t you deliver at an health facility?	Chumanyi chaleteli mukang’anyi kusampulukila ku chipateli?		selected(${birth1}, '5') or selected(${birth1}, '6')
integer	birth2o	Which other reason?	Which other reason?		selected(${birth2}, '8')
select_one delivery	delivery	Who assisted you during your last delivery?	Hiyanyi ayikwashili hakusampuluka?					yes
text	deliveryo	Who else assisted you?	Mukwawu inyi wakukwashili?		selected(${delivery}, '6')
select_one bf	bf	How many months did you breastfeed your youngest child before you started him/her on water/liquids or semi-solid food or anything else?	Indi mwanenu wanyanya wamwini tukwezhi ang’ahi kumayeli chakadi kumunwisha menzhi hela kumwinka yakudya?					yes
select_one vacc	vacc	Do you have a vaccination card for your youngest child?	Mwekala na kadi yamwana wanyanya yakuchipateli tahindi? (under 5 card)	Ask to see that card! They should be bring it to the clinical field laboratory as well, if available.				yes
select_one diarr1	diarr1	Has your youngest child had diarrhoea in the last 2 weeks?	Mwanenu wanyanya wakatiluhudehi kuhitisha nyilungu iyedi inahiti tahindi?					yes
select_one ari1	ari1	Has your youngest child had an illness with a cough any time in the last 2 weeks?	Mwanenu wanyanya wakatiluhu chikatu chakumuletela kakohu munyilungu iyedi inahiti tahindi?					yes
select_one ari2	ari2	When your youngest child had an illness with a cough, did he/she breathe faster than usual or have any difficulty in breathing (short rapid breaths)?	Mwanenu wanyanya chakatili kakohu wading’i nakonashana tahindi wading’i kona chononu hela koka ikokafu?
select_one ari3	ari3	Has your youngest child had wheezing or whistling in the chest in the last 2 weeks?	Mwanenu wanyanya wakatili nakuhwilila muntulu hanyilungu inahiti iyedi tahindi?					yes
note	hsb	Health seeking behaviour	Yililu yakukeng’a kuhanda kwamuzhimba
select_one hsb1	hsb1	When your youngest child was last sick, where did you first seek treatment or medical advice?	Mwanenu wanyanya chakatiliyi, kudi kumwatachikili kuya nakutambula ukwashu?	If multiple, chose FIRST place of advice.				yes
text	hsb1o	Where else did you first seek medical advice?	Where else did you first seek medical advice?		selected(${hsb1}, '14')
select_multiple hsb2	hsb2	Why did you not go to a health facility?	Indi mwakang’enyi ng’ahi kuya kuchipateli?	Multiple answers possible.	selected(${hsb1}, '5') or selected(${hsb1}, '6')
text	hsb2o	What else did you do?	Yumanyi ikwawu wela?		selected(${hsb2}, '6')
select_one hsb3	hsb3	Do you ever go to a traditional healer when your child is sick?	Kwekalahu mpinji yimwayang’a kudi ayimbuku neyi mwana nakati tahindi?
begin group	finterventions								field-list
select_one yes_no	fint	Which of the following health programmes/activities in your village have you ever participated/attended?	Kulong’eshanyi kukwawu kwakuhanda kwakumuzhimba mumukala wazhatahudehi?	Promt all answers.					label
select_one yes_no	fint1	Health Road Shows	Kumwekesha kuhanda kwakumuzhimba hanyikwakwa					yes	list-nolabel
select_one yes_no	fint2	Voluntary Counselling and Testing (VCT)	Kudihana kwakukukwasha nakukupima					yes	list-nolabel
select_one yes_no	fint3	Malaria seek and treat	Kupima nakuka kwa musong’u wamashika					yes	list-nolabel
select_one yes_no	fint4	Indoor residual spraying (IRS)	Kusansa yitumbu kwakuzhiha tububu twaletang’a mashika					yes	list-nolabel
select_one yes_no	fint5	Training (peer educator, malaria agent, psychosocial, spay operator)	Kutang’isha (akwetu, akakuking’a musong’u wa mashika, akakukwasha, akakusansa)					yes	list-nolabel
select_one yes_no	fint6	Community drama	Kuhema kwamuntung’ili					yes	list-nolabel
select_one yes_no	fint7	Clinic	Chipatela						list-nolabel
select_one yes_no	fint8	Other	Yikwawu						list-nolabel
select_one yes_no	fint9	None	Kosi						list-nolabel
end group
select_multiple fimp	fimp	Who delivered/organised the programmes?	Hiyanyi awombolweli antu nikulombola mudimu waweni?					yes
text	fimpo	Who else?	Hinyi mukwawu?		selected(${fimp}, '4')
note	malaria	Malaria	Musong’u wamashika
select_one fmalaria1	fmalaria1	Have you ever heard about malaria?	Mwatiyahodehi nsang’u yaikatu yamashika (malaria)?					yes
select_multiple fmalaria2	fmalaria2	In your opinion, what are the ways you can get malaria?	Mukutong’ojoka chenu muntu ukutwesha ng’ahi kutambula chikatu cha mashika? (malaria)	Do not prompt answers. Multiple answers possible.	not(selected(${fmalaria1}, '2'))
text	fmalaria2o	Which other?	Hinyi mukwawu?		(selected(${fmalaria2}, '15'))
select_multiple fmalaria3	fmalaria3	How can you prevent yourself from getting malaria?	Mukutwesha ng’ahi kudihemba ku chikatu cha mashika (malaria)	Do not prompt answers. Multiple answers possible.	not(selected(${fmalaria1}, '2'))
text	fmalaria3o	How else?	How else?		(selected(${fmalaria5}, '14'))
select_multiple fmalaria4	fmalaria4	If you or a member of your family were to present with the signs and symptoms of malaria where would you seek treatment?	Indi neyi munamoni hela kutiya yinjikijilu ya mashika, kudi komwayang’a nakutambula kukewa?		not(selected(${fmalaria1}, '2'))
text	fmalaria4o	Where else?	Where else?		(selected(${fmalaria4}, '14'))
select_one fmalaria5	fmalaria5	How soon after suspecting that you or your family were infected with malaria, would you seek treatment?	Kwahitang’a mpinji yaleha ng’ahi hakwila enu hela wachisaka chenu ayi nakukewa ku chikatu cha mashika? (malaria)		not(selected(${fmalaria1}, '2'))
select_one fmalaria6	fmalaria6	The last time your household member had symptoms/signs of malaria, was a finger prick test done, or was the person diagnosed based on symptoms?	Mpinji yakatili mashika wahachisaka chenu, amuchonkweli kumunu nakupima mashi tahindi amuukili hohu kwesekana nayinjikijilu yatiileng’ayi?		not(selected(${fmalaria1}, '2'))
select_multiple fmalaria7	fmalaria7	What medication did the household member who had malaria take?	Chakatili mashika waha chisaka chenu amwinkeli yitumbu yamuchilinyi?		not(selected(${fmalaria1}, '2'))
select_one fmalaria8	fmalaria8	Was your house/room where you or your family sleeps sprayed with insecticide in the past year?	Mwitala mumwakamang’a asansilumu itumbu chaka chinamani tahindi?
select_multiple fmalaria9	fmalaria9	In your opinion, what are the benefits of the spraying?	In your opinion, what are the benefits of the spraying?		not(selected(${fmalaria8}, '2'))
integer	fmalaria9o	Which other benefit(s)?	Which other benefit(s)?		(selected(${fmalaria9}, '4'))
select_one fmalaria10	fmalaria10	Are you happy with the spraying service?	Mwatiyang’a kuwaha namudimu wakusansa itumbu mumatala tahindi?		not(selected(${fmalaria8}, '2'))
select_one fmalaria11	fmalaria11	If not, what were the reasons	Indi neyi nehi, chumanyi chaletang’a kutiya chikela?		(selected(${fmalaria10}, '2'))
note	fhivaids	HIV/AIDS	Musong’u wakapweli
select_one fhiv1	fhiv1	Have you ever heard of HIV/AIDS?	Mwatiyaho dehi nawu kwekala musong’u wa HIV/AIDS?					yes
select_one fhiv2	fhiv2	Do you think you can prevent HIV/AIDS?	Munatong’ojoki nenu mukutwesha kudihemba ku musong’u wa HIV/AIDS tahindi?		not(selected(${fhiv1}, '2'))
begin group	fhivprevention	HIV prevention	Kuking’a ku kabubu	Promt all answers.	not(selected(${fhiv1}, '2'))				field-list
select_one yes_no_dk	fhivprevention	In your opinion, can people … ?	Muyitong’ojoka yenu antu anatweshi…?						label
select_one yes_no_dk	fhivprev1	…reduce their chances of getting HIV/AIDS by having just one uninfected sex partner who has no other sex partners?	…kukehesha musong’u wa HIV/AIDS hakushakama nakajila umu wabula atujila akwawu?					yes	list-nolabel
select_one yes_no_dk	fhivprev2	…reduce their chances of getting AIDS by using a condom every time they have sex?	…kukehesha musong’u wa HIV/AIDS kuhitila mukuzatisha nyipila yamakondomu tahindi?					yes	list-nolabel
select_one yes_no_dk	fhivprev3	…reduce their chances of getting AIDS by abstaining from sex?	…kukehesha musong’u wa HIV/AIDS hakuleka wujila?					yes	list-nolabel
select_one yes_no_dk	fhivprev4	…get HIV/AIDS from mosquito bites?	…kutambula musong’u wa HIV/AIDS hakuyisuma kudi ang’weneni?					yes	list-nolabel
select_one yes_no_dk	fhivprev5	…get HIV/AIDS because of witchcraft or supernatural means?	...kutambula musong’u wa HIV/AIDS kuhitila muwang’a?					yes	list-nolabel
select_one yes_no_dk	fhivprev6	…get HIV/AIDS by sharing food with a person who has AIDS?	...kutambula musong’u wa HIV/AIDS hakudiila hamu namuntu wakata AIDS?					yes	list-nolabel
select_one yes_no_dk	fhivprev7	…get HIV/AIDS because of sharing contaminated injection needles, sharp/razors?	...kutambula musong’u wa HIV/AIDS kuhitila mukuzatisha ndong’u ni Yuma yawambuka yamajilu?					yes	list-nolabel
end group
begin group	fmtct	HIV transmission from mother-to-child	Kutambwisha mwana kabubu kumamayindi	Promt all answers.	not(selected(${fhiv1}, '2'))				field-list
select_one yes_no_dk	fmtct	Can the AIDS virus be transmitted from mother to baby…	Tububu twa AIDS tunatweshi kufuma hadi mukwamama nakuya hamwana…						label
select_one yes_no_dk	fmtct1	...during pregnancy?	... mpinji yevumu?					yes	list-nolabel
select_one yes_no_dk	fmtct2	...during delivery?	... hakusampuluka?					yes	list-nolabel
select_one yes_no_dk	fmtct3	...during breastfeeding?	... hakwamwisha?					yes	list-nolabel
end group
begin group	fhivawareness	HIV awareness			not(selected(${fhiv1}, '2'))				field-list
select_one fhivprev8	fhivprev8	Are there any special drugs that a doctor or a nurse can give to a woman infected with the AIDS virus to reduce the risk of transmission to the baby?	Kwekala itumbu yahanang’a andotolu kudi mukwamama udi natububu twa AIDS kukang’esha tububu kusambukila mwana tahindi?					yes
select_one fhiva1	fhiva1	Is it possible for a healthy-looking person to have HIV/AIDS?	Chinatwesheki muntu wamuweng’i kwikala natububu twa AIDS tahindi?					yes
select_one fhiva2	fhiva2	Would you buy fresh vegetables or fruit from somebody that has HIV/AIDS?	Mukutwesha kulanda mafu hela nyikabu ku muntu wekala natububu twa HIV/AIDS tahindi?					yes
select_one fhiva3	fhiva3	If a member of your family gets HIV/AIDS, would you keep it a secret?	Indi neyi mukwachisaka chenu natambuli tububu twa HIV/AIDS mukutwesha kujinda tahindi?					yes
end group
select_one fvct1	fvct1	Have you ever voluntarily taken a HIV/AIDS test?	Mwayaho dehi nakupimisha musong’u wa HIV/AIDS (other than during ANC) (bayi hakupimisha ivumuku nehi)	Other than during antenatal care (ANC) in pregnancy	not(selected(${fhiv1}, '2'))			yes
select_one fvct2	fvct2	Where did you do your last (most recent) HIV test?	Neyi nenu eng’a mwapimishili kumu kudihi kachawichi?		(selected(${fvct1}, '1'))
select_multiple fvct3	fvct3	May I ask you why not?	Neyi kanda mupimisheng’ahudehi ,chumanyi chaletesha kubula kupimisha?		(selected(${fvct1}, '2'))
text	fvct3o	What other reason?	What other reason?		(selected(${fvct3}, '11'))
select_multiple fvct4	fvct4	Can you tell me where does a person go for medical help when he or she becomes infected with AIDS?	Mukutwesha kunleja kwayang’awu antu nakutambula ukwashi neyi anasambuli kabubu ka HIV/AIDS?	Multiple answers possible.	not(selected(${fhiv1}, '2'))			yes
select_one fhiviec1	fhiviec1	Has anything been done in this community specifically to prevent the spread of HIV/AIDS?	Kudi yinediki kwakukang’esha kwambula musong’u wa HIV/AIDS muchitungilu?		not(selected(${fhiv1}, '2'))			yes
select_multiple fhiviec2	fhiviec2	If yes, what are the programmes/activities that have been done or ongoing (to prevent the spread of HIV?	Neyi eng’a? Kulong’eshanyi kunelikewi kukuking’a kwa kabubu ka HIV?		(selected(${fhiviec1}, '1'))
select_multiple fhiviec3	fhiviec3	Who is doing these HIV programmes/interventions?	Hinyi unakwila yeniyi nlong’eshelu?		(selected(${fhiviec1}, '1'))
note	fsexrephealth	Sexual and Reproductive Health Now I would like to ask some questions about sexual activity in order to gain a better understanding of some important life issues. Let me assure you again that your answers are completely confidential and will not be told to anyone. If we should come to any question that you don't want to answer, just let me know and we will go to the next question.	Kuhanda kwakumuzhimba kwakusema Katataka nakukeng’a kwihula malwihu akuhumang’ana iyala na mumbanda kulonda nilukishi chachiwahi kuhanda kwalema. Nakukeng’a kuyilezha name kwakula kwenu hichizhindilu nankashi tukulezha hela umu wanyi. Neyi tukwinza kulwihu yidi yezhima yimunakeng’I kwakula wanyi nlezhenu kulonda tuyi kulwihu lukwawu.
begin group	fsrh	Age at first sexual intercourse	Yakanyi yiwading’I nayu hakukama neyala watachi						field-list
integer	fsrh1	How old were you when you had sexual intercourse for the very first time?	Mwading’i nayaka ing’ahi mpinji imwadilukili neyala wakusambila?
select_one fsrh1a	fsrh1a	If no age precision:	Kutong’ozhoka yaka nehi:
end group
select_one fsrh2	fsrh2	What is your relationship to the man with whom you last had sexual intercourse?	Mwekali nindi ng’ahi iyala umwakamini nindi kachawichi?					yes
select_one fsrh3	fsrh3	Did you use a condom at this time (last sexual intercourse)?	Mwazatishili mupila wa kondomu tahindi?
select_multiple fsrh4	fsrh4	Why did you use a condom on this occasion?	Mulong’adi mwazatishili kondomu?	Multiple answers possible.	(selected(${fsrh3}, '1'))
select_multiple fsrh5	fsrh5	Why did you NOT use a condom on this occasion (last sexual intercourse)?	Mwabulilidi kuzatisha kondomu?	Multiple answers possible.	(selected(${fsrh3}, '2'))
select_one fsrh6	fsrh6	Have you had any other sexual partner (s) in the past 12 months?	Mwakaminuhu namumbanda mukwawu mutukwezi 12 anahiti tahindi?					yes
select_one fsrh7	fsrh7	Were you paid in money, or in kind, for this sexual intercourse (during sex with other partner)?	Weyala wafweteli madi tahindi mawana hanyima yakukama nindi?		(selected(${fsrh6}, '1'))
select_one fsrh8	fsrh8	Did you use a condom at this time (during sex with other partner)?	Hadiyi mpinji mwazatishili mupila wa kondomu tahindi?		(selected(${fsrh6}, '1'))
select_one fsrh9	fsrh9	Could you ask your spouse/cohabiting partner to use a condom if you wanted him to?	Munatweshi kulomba mfum’wenu hela kajila kenu kuzatisha mupila wakondomu neyi munakeng’i tahindi?					yes
select_one fsrh10	fsrh10	Do you know of a place where a person can get condoms?	Mwelukahu ilung’a kumunatweshi kutambula nyipila yamakondomu tahindi?					yes
select_multiple fsrh11	fsrh11	Where is that? (a place where one can get a condom)	Dikumu kudihi?		(selected(${fsrh10}, '1'))
select_one fsrh12	fsrh12	Do you feel comfortable buying or asking for a condom?	Chekala chaswayi kulanda hela kulomba nyipila yamakondomu tahindi?		(selected(${fsrh10}, '1'))			yes
select_one fsrh13	fsrh13	During the last 12 months, have you had a disease which you thought or was told you got through sexual contact (STI)?	Mwatambwiluhu musong’u wa uvumbi ha tukweji 12 tunahiti tahindi?					yes
note	frtb	Respiratory Issues and Tuberculosis	Konashana na musong’u wa muntulu
select_one frtb1	frtb1	In the last 2 weeks, have you (ever) coughed?	Mwakatiluhu kakohu hamilungu iyedi inahiti tahindi?					yes
select_one frtb2	frtb2	In the last 2 weeks, have you (ever) brought up sputum?	Mwedishahodehi makohola hanyilungu iyedi inahiti tahindi?					yes
begin group	frtb3	Episodes of lung/respiratory episodes	Kukala kwachampinji chamapwapwa nakonashana						field-list
integer	frtb3a	During the last 2 weeks, how many very unpleasant episodes of lung/respiratory problems have you had?	Mwakatiluhu ntulu mapampa kang’ahi munyilungu iyedi inahiti?
select_one frtb3b	frtb3b	If no number specified:	Neyi mapampa kosi, shimunang’a:
end group
select_one frtb4	frtb4	Have you been woken in sleep by an attack of shortness of breath at any time in the last 12 months?	Hatukwezhi 12 tunahiti mwahindukiluhu chakwikasumwisha hansang’u yakonashana nawufuku?					yes
select_one frtb5	frtb5	Have you been woken in sleep by an attack of coughing at any time in the last 12 months?	Hatukwezhi 12 tunahiti mwahindukiluhu chakwikasumwisha hansang’u yakukohola naufuku tahindi?					yes
select_one frtb6	frtb6	Have you ever heard of an illness called Tuberculosis (TB)?	Mwatiyahodehi musong’u wa TB?					yes
select_multiple frtb7	frtb7	In your opinion, how can you get TB?	Mukutong’ojoka chenu munatweshi ng’ahi kusambula musong’u wa TB?		(selected(${frtb6}, '1'))
text	frtb7o	How else?			(selected(${frtb7}, '10'))
select_one frtb8	frtb8	Do you think TB is curable?	Musong’u wa TB awukang’a tahindi?		(selected(${frtb6}, '1'))
select_one frtb9	frtb9	Have you or any of your family members been treated for tuberculosis (TB) in the past year?	Mwekalahodehi ni ntang’a hela wachisaka chenu wokewadehi ku musong’u wa TB mu chaka chimu chinahiti?		(selected(${frtb6}, '1'))
note	nutrition	Nutrition	Kuda chakuhandisha muzhimba
select_one fnut1	nut1	Have you ever heard of malnutrition?	Mwatiyahodehi nawu malnutrition? (musong’u wa nzala)					yes
select_one fnut2	nut2	Do you think that malnutrition is a problem in your community?	Mwekala nikukala kwa malnutrition mwilung’a denu tahindi?		(selected(${nut1}, '1'))
select_multiple fnut3	nut3	What do you think are the causes of malnutrition?	Yumanyi yaletang’a malnutrition?	Do not prompt answers. Multiple answers possible.	(selected(${nut1}, '1'))
text	nut4	Which other cause(s)?			(selected(${nut3}, '8'))
note	fsocial	Social determinants of health	Kwesekezha kwa chihandilu cha muzhimba
select_one fsdh1	fsdh1	Do you drink alcohol?	Mwanwang’a walwa tahindi?					yes
select_one fsdh2	fsdh2	In the last one week how many days did you drink alcohol?	Mulungu unamani mwanwinumu walwa mafuku ang’ahi?		(selected(${fsdh1}, '1'))
select_one fsdh3	fsdh3	Do you currently smoke cigarettes?	Mwanwang’a makanya tahindi?					yes
integer	fsdh4	How many cigarettes did you smoke in the last 24 hours?	Nyisang’a ing’ahi imunapepi ifuku dinahiti?		(selected(${fsdh3}, '1'))
integer	fsdh5	How many people living in this home/household smoke regularly?	Antu ang’ahi ashakama munu mwitala anwinang’a (kupepa) makanya mwitala?					yes
select_one fsdh6	fsdh6	How often does anyone smoke inside your house? Would you say daily, weekly, monthly, less than monthly, or never?	Mukwila nenu apepang’a mapampa kang’ahi mwitala? Hefuku hefuku,hamulungu hamulungu, chibalu chakakweji hela kwosi wanwang’a makanya?	Specify INSIDE the house.
select_one fsdh7	fsdh7	Do you consider drug abuse as a problem in your community?	Mwekala nakukala kwakunwa itumbu yashetana mwilung’a tahindi?					yes
select_one fsdh8	fsdh8	Is it common in this community that sex is exchanged for money, gifts or favours?	Uvumbi wakufwila mali, mawana hela wuselewa wawuvulu mwilung’a denu tahindi?					yes
begin group	fdv	Domestic violence							field-list
select_one yes_no	fsdh9	Sometimes a husband is angry with his wife. In your opinion, is a husband justified to beat his wife in the following situations:	Kwekalang’a mpinji yakwila iyala hakuzuwila ing’odindi. Enu muneteji iyala kweta ing’odindi neyi mumbanda neli Yuma inukutena hano: (tang’aku)	Promt all answers.					label
select_one yes_no	fsdh9a	If she goes out without telling him	Neyi nawomboloki:					yes	list-nolabel
select_one yes_no	fsdh9b	If she neglects the children	Neyi nakang’anyi kuhemba nyana					yes	list-nolabel
select_one yes_no	fsdh9c	If she argues with him	Neyi ukutadika nimfum’windi					yes	list-nolabel
select_one yes_no	fsdh9d	If she refuses to have sexual intercourse with him	Neyi ukana kukama ni mfum’windi					yes	list-nolabel
select_one yes_no	fsdh9e	If she burns the food	Neyi ukusukumisha chakudisha					yes	list-nolabel
end group
select_one fsdh10	fsdh10	During the past 12 months have you ever felt insecure or feared for your life in your community?	Mukachi ka chaka chinamani kwading’uhu mpinji yakudakamena hela kutiya woma muwumi wenu amunu mwilung’a tahindi?					yes
select_one fsdh11	fsdh11	In your opinion, would you say that this community is a place where people look after each other?	Muyitong’ojoka yenu mukutena nawu antu mumukala wenu anakudihemba chachiwahi tahindi?					yes
select_one fsdh12	fsdh12	Would you say that in general your health is…	Mukwiteja nenu wumi wenu wakola…	Promt all answers.				yes
begin group	fgenhealth	General health and well-being							field-list
integer	fsdh13a	During the past 30 days, for about how many days did poor physical or mental health keep you from doing your usual activities, such as self-care, work, or recreation?	Kakweji namani mwakatilumu mafuku ang’ahi chakwila mukang’anya nikuzata?			. <=31		yes
select_one fsdh13b	fsdh13b	If no days specified	Neyi mafuku kosi shimunang’a
end group
note	fairnoise	Air and Noise Pollution	Mpepela namazung’u atama
select_one fnoise1	fnoise1	Is there any noise pollution in this area?	Akunu kwilung’a kwekala yivumina yakulendumuka yayinkang’a kukala tahindi?					yes
select_multiple fnoise2	fnoise2	What type of noise pollution is there?	Yivumina yamuchidinyi?		(selected(${fnoise1}, '1'))
text	fnoise3	Which other noise pollution?	Mazung’unyi atama makwawu?		(selected(${fnoise2}, '4'))			yes
select_multiple fair1	fair1	Is there any air pollution in this area?	Kutama kwamuchidinyi kwenzang’a mumpepela?
select_one fair2	fair2	What type of air pollution is there?	Kutama kwamuchidinyi kwenzang’a mumpepela?		(selected(${fair1}, '1'))
text	fair3	Which other air pollution?	Mpepela yatamanyi yikwawu?		(selected(${fair2}, '4'))
begin group	water	Water sample	Water sample						field-list
note	ws1	Check if you have to collect a water sample in this household. If yes, do it with the mother now. Ask the mother to give you a sample of the household drinking water out of the container where the water is stored. She can use the container they use to drink to pour the water into your sterile water bottle. Remember that nothing should touch the lid or the water bottle in order not to contaminate …	Check if you have to collect a water sample in this household. If yes, do it with the mother now. Ask the mother to give you a sample of the household drinking water out of the container where the water is stored. She can use the container they use to drink to pour the water into your sterile water bottle. Remember that nothing should touch the lid or the water bottle in order not to contaminate …
select_one ws2	ws2	Water sample:	Water sample:					yes
text	ws3	Why was it not possible to collect a water sample in this household?	Why was it not possible to collect a water sample in this household?		(selected(${ws2}, '3'))
end group
text	fcomments	Comments from the female respondent	Comments from the female respondent	Please do never press ENTER when entering text!
note	endmother	THANK YOU A LOT FOR PARTICIPATING IN THIS QUESTIONNAIRE SURVEY. The mother is now invited to attend the clinical field laboratory with all her children under 5 years of age. If available, she can take the child/vaccination cards with her. The quesitonnaire is now continued with a male member of the household (ideally the father of the children, but not necessarily). The father should be joining t…	THANK YOU A LOT FOR PARTICIPATING IN THIS QUESTIONNAIRE SURVEY. The mother is now invited to attend the clinical field laboratory with all her children under 5 years of age. If available, she can take the child/vaccination cards with her. The quesitonnaire is now continued with a male member of the household (ideally the father of the children, but not necessarily). The father should be joining t…
end group	s2
begin group	mang								field-list
note	manq	Man's questionnaire	Malwihu aweyala
select_one man	man	Is a male adult aged above 14 years in the household that can be interviewed?	Mudi weyala wunabadiki yaka ikumi dimu nayiwana munu mwitala tunatweshi kwihula malwihu?					yes
end group
begin group	s3	3 Men's questionnaire	Malwihu aweyala		(selected(${man}, '1'))
note	sociodemographics	Socio-demographic characteristics	Yuma yamwekeshang’a chihandilu chawantu
begin group	agem								field-list
integer	agem1	How old are you?	Yaka ying’ahi wudi nayu?			. <=99
select_one agem2	agem2	If no age precision:	Kutong’ozhoka yaka nehi:
end group
select_one maritalm	maritalm	What is your marital status?	Wasumbuka tahindi?					yes
select_one edum	edum	What is your highest education level?	Indi kushikola mwakuminini munka?					yes
select_one occupm	occupm	What is your occupation, i.e. what is the principal work you do (to generate income)?	Mwazatang’a mudimwinyi mukuhanda chenu?					yes
text	occupmo	Which other occupation?	Chikota chamudimunyi chikwawu?		selected(${occupm}, '17')
begin group	minterventions								field-list
select_one yes_no	mint	Which of the following health programmes/activities in your village have you ever participated/attended?	Kulong’eshanyi kukwawu kwakuhanda kwakumuzhimba mumukala wazhatahudehi?	Promt all answers.					label
select_one yes_no	mint1	Health Road Shows	Kumwekesha kuhanda kwakumuzhimba hanyikwakwa					yes	list-nolabel
select_one yes_no	mint2	Voluntary Counselling and Testing (VCT)	Kudihana kwakukukwasha nakukupima					yes	list-nolabel
select_one yes_no	mint3	Malaria seek and treat	Kupima nakuka kwa musong’u wamashika					yes	list-nolabel
select_one yes_no	mint4	Indoor residual spraying (IRS)	Kusansa yitumbu kwakuzhiha tububu twaletang’a mashika					yes	list-nolabel
select_one yes_no	mint5	Training (peer educator, malaria agent, psychosocial, spay operator)	Kutang’isha (akwetu, akakuking’a musong’u wa mashika, akakukwasha, akakusansa)					yes	list-nolabel
select_one yes_no	mint6	Community drama	Kuhema kwamuntung’ili					yes	list-nolabel
select_one yes_no	mint7	Clinic	Chipatela						list-nolabel
select_one yes_no	mint8	Other	Yikwawu						list-nolabel
select_one yes_no	mint9	None	Kosi						list-nolabel
end group
select_multiple mimp	mimp	Who delivered/organised the programmes?	Hiyanyi awombolweli antu nikulombola mudimu waweni?
text	mimpo	Who else?	Hinyi mukwawu?		selected(${mimp}, '4')
note	mmalaria	Malaria	Musong’u wamashika
select_one mmalaria1	mmalaria1	Have you ever heard about malaria?	Mwatiyahodehi nsang’u yaikatu yamashika (malaria)?					yes
select_multiple mmalaria2	mmalaria2	In your opinion, what are the ways you can get malaria?	Mukutong’ojoka chenu muntu ukutwesha ng’ahi kutambula chikatu cha mashika? (malaria)	Do not prompt answers. Multiple answers possible.	not(selected(${mmalaria1}, '2'))
text	mmalaria2o	Which other?	Hinyi mukwawu?		(selected(${mmalaria2}, '15'))
select_multiple mmalaria3	mmalaria3	How can you prevent yourself from getting malaria?	Mukutwesha ng’ahi kudihemba ku chikatu cha mashika (malaria)	Do not prompt answers. Multiple answers possible.	not(selected(${mmalaria1}, '2'))
text	mmalaria3o	How else?	How else?		(selected(${mmalaria5}, '14'))
select_multiple mmalaria4	mmalaria4	If you or a member of your family were to present with the signs and symptoms of malaria where would you seek treatment?	Indi neyi munamoni hela kutiya yinjikijilu ya mashika, kudi komwayang’a nakutambula kukewa?		not(selected(${mmalaria1}, '2'))
text	mmalaria4o	Where else?	Where else?		(selected(${mmalaria4}, '14'))
select_one mmalaria5	mmalaria5	How soon after suspecting that you or your family were infected with malaria, would you seek treatment?	Kwahitang’a mpinji yaleha ng’ahi hakwila enu hela wachisaka chenu ayi nakukewa ku chikatu cha mashika? (malaria)		not(selected(${mmalaria1}, '2'))
select_one mmalaria6	mmalaria6	The last time your household member had symptoms/signs of malaria, was a finger prick test done, or was the person diagnosed based on symptoms?	Mpinji yakatili mashika wahachisaka chenu, amuchonkweli kumunu nakupima mashi tahindi amuukili hohu kwesekana nayinjikijilu yatiileng’ayi?		not(selected(${mmalaria1}, '2'))
select_multiple mmalaria7	mmalaria7	What medication did the household member who had malaria take?	Chakatili mashika waha chisaka chenu amwinkeli yitumbu yamuchilinyi?		not(selected(${mmalaria1}, '2'))
select_one mmalaria8	mmalaria8	Was your house/room where you or your family sleep sprayed in the past year?	Mwitala mumwakamang’a asansilumu itumbu chaka chinamani tahindi?
select_multiple mmalaria9	mmalaria9	In your opinion, what are the benefits of the spraying?	In your opinion, what are the benefits of the spraying?		not(selected(${mmalaria8}, '2'))
integer	mmalaria9o	Which other benefit(s)?	Which other benefit(s)?		(selected(${mmalaria9}, '4'))
select_one mmalaria10	mmalaria10	Are you happy with the spraying service?	Mwatiyang’a kuwaha namudimu wakusansa itumbu mumatala tahindi?		not(selected(${mmalaria8}, '2'))
select_one mmalaria11	mmalaria11	If no, what were the reasons	Indi neyi nehi, chumanyi chaletang’a kutiya chikela?		(selected(${mmalaria10}, '2'))
note	mhivaids	HIV/AIDS	Musong’u wakapweli
select_one mhiv1	mhiv1	Have you ever heard of HIV/AIDS?	Mwatiyaho dehi nawu kwekala musong’u wa HIV/AIDS?					yes
select_one mhiv2	mhiv2	Do you think you can prevent HIV/AIDS?	Munatong’ojoki nenu mukutwesha kudihemba ku musong’u wa HIV/AIDS tahindi?		not(selected(${mhiv1}, '2'))
begin group	mhivprevention	HIV prevention	Kuking’a ku kabubu	Promt all answers.	not(selected(${mhiv1}, '2'))				field-list
select_one yes_no_dk	mhivprevention	In your opinion, can people … ?	Muyitong’ojoka yenu antu anatweshi…?						label
select_one yes_no_dk	mhivprev1	…reduce their chances of getting HIV/AIDS by having just one uninfected sex partner who has no other sex partners?	…kukehesha musong’u wa HIV/AIDS hakushakama nakajila umu wabula atujila akwawu?					yes	list-nolabel
select_one yes_no_dk	mhivprev2	…reduce their chances of getting AIDS by using a condom every time they have sex?	…kukehesha musong’u wa HIV/AIDS kuhitila mukuzatisha nyipila yamakondomu tahindi?					yes	list-nolabel
select_one yes_no_dk	mhivprev3	…reduce their chances of getting AIDS by abstaining from sex?	…kukehesha musong’u wa HIV/AIDS hakuleka wujila?					yes	list-nolabel
select_one yes_no_dk	mhivprev4	…get HIV/AIDS from mosquito bites?	…kutambula musong’u wa HIV/AIDS hakuyisuma kudi ang’weneni?					yes	list-nolabel
select_one yes_no_dk	mhivprev5	…get HIV/AIDS because of witchcraft or supernatural means?	...kutambula musong’u wa HIV/AIDS kuhitila muwang’a?					yes	list-nolabel
select_one yes_no_dk	mhivprev6	…get HIV/AIDS by sharing food with a person who has AIDS?	...kutambula musong’u wa HIV/AIDS hakudiila hamu namuntu wakata AIDS?					yes	list-nolabel
select_one yes_no_dk	mhivprev7	…get HIV/AIDS because of sharing contaminated injection needles, sharp/razors?	...kutambula musong’u wa HIV/AIDS kuhitila mukuzatisha ndong’u ni Yuma yawambuka yamajilu?					yes	list-nolabel
end group
begin group	mmtct	HIV transmission from mother-to-child	Kutambwisha mwana kabubu kumamayindi	Promt all answers.	not(selected(${mhiv1}, '2'))				field-list
select_one yes_no_dk	mmtct	Can the AIDS virus be transmitted from mother to baby…	Tububu twa AIDS tunatweshi kufuma hadi mukwamama nakuya hamwana…						label
select_one yes_no_dk	mmtct1	...during pregnancy?	... mpinji yevumu?					yes	list-nolabel
select_one yes_no_dk	mmtct2	...during delivery?	... hakusampuluka?					yes	list-nolabel
select_one yes_no_dk	mmtct3	...during breastfeeding?	... hakwamwisha?					yes	list-nolabel
end group
begin group	mhivawareness	HIV awareness							field-list
select_one mhivprev8	mhivprev8	Are there any special drugs that a doctor or a nurse can give to a woman infected with the AIDS virus to reduce the risk of transmission to the baby?	Kwekala itumbu yahanang’a andotolu kudi mukwamama udi natububu twa AIDS kukang’esha tububu kusambukila mwana tahindi?		not(selected(${mhiv1}, '2'))			yes
select_one mhiva1	mhiva1	Is it possible for a healthy-looking person to have HIV/AIDS?	Chinatwesheki muntu wamuweng’i kwikala natububu twa AIDS tahindi?		not(selected(${mhiv1}, '2'))			yes
select_one mhiva2	mhiva2	Would you buy fresh vegetables or fruit from somebody that has HIV/AIDS?	Mukutwesha kulanda mafu hela nyikabu ku muntu wekala natububu twa HIV/AIDS tahindi?		not(selected(${mhiv1}, '2'))			yes
select_one mhiva3	mhiva3	If a member of your family gets HIV/AIDS, would you keep it a secret?	Indi neyi mukwachisaka chenu natambuli tububu twa HIV/AIDS mukutwesha kujinda tahindi?		not(selected(${mhiv1}, '2'))			yes
end group
select_one mvct1	mvct1	Have you ever voluntarily taken a HIV/AIDS test?	Mwayaho dehi nakupimisha musong’u wa HIV/AIDS (other than during ANC) (bayi hakupimisha ivumuku nehi)		not(selected(${mhiv1}, '2'))			yes
select_one mvct2	mvct2	If yes, where did you do your last (most recent) HIV test?	Neyi nenu eng’a mwapimishili kumu kudihi kachawichi?		(selected(${mvct1}, '1'))
select_multiple mvct3	mvct3	If you have not taken a HIV test, may I ask you why not?	Neyi kanda mupimisheng’ahudehi ,chumanyi chaletesha kubula kupimisha?		(selected(${mvct1}, '2'))
text	mvct3o	What other reason?	What other reason?		(selected(${mvct3}, '11'))
select_multiple mvct4	mvct4	Can you tell me where does a person go for medical help when he or she becomes infected with AIDS?	Mukutwesha kunleja kwayang’awu antu nakutambula ukwashi neyi anasambuli kabubu ka HIV/AIDS?	Multiple answers possible.	not(selected(${mhiv1}, '2'))			yes
select_one mhiviec1	mhiviec1	Has anything been done in this community specifically to prevent spread of HIV/AIDS?	Kudi yinediki kwakukang’esha kwambula musong’u wa HIV/AIDS muchitungilu?		not(selected(${mhiv1}, '2'))			yes
select_multiple mhiviec2	mhiviec2	If yes, what are the programmes/activities that have been done or ongoing (to prevent the spread of HIV?	Neyi eng’a? Kulong’eshanyi kunelikewi kukuking’a kwa kabubu ka HIV?		(selected(${mhiviec1}, '1'))
select_multiple mhiviec3	mhiviec3	Who is doing these HIV programmes/interventions?	Hinyi unakwila yeniyi nlong’eshelu?		(selected(${mhiviec1}, '1'))
note	msexrephealth	Sexual and Reproductive Health Now I would like to ask some questions about sexual activity in order to gain a better understanding of some important life issues. Let me assure you again that your answers are completely confidential and will not be told to anyone. If we should come to any question that you don't want to answer, just let me know and we will go to the next question.	Kuhanda kwakumuzhimba kwakusema Katataka nakukeng’a kwihula malwihu akuhumang’ana iyala na mumbanda kulonda nilukishi chachiwahi kuhanda kwalema. Nakukeng’a kuyilezha name kwakula kwenu hichizhindilu nankashi tukulezha hela umu wanyi. Neyi tukwinza kulwihu yidi yezhima yimunakeng’I kwakula wanyi nlezhenu kulonda tuyi kulwihu lukwawu.
begin group	msrh1g	Age at first sexual intercourse	Yakanyi yiwading’I nayu hakukama neyala watachi						field-list
integer	msrh1	How old were you when you had sexual intercourse for the very first time?	Mwading’i nayaka ing’ahi mpinji imwadilukili neyala wakusambila?
select_one msrh1a	msrh1a	No age precision:	Kutong’ozhoka yaka nehi:
end group
select_one msrh2	msrh2	What is your relationship to the woman with whom you last had sexual intercourse?	Mwekali nindi ng’ahi iyala umwakamini nindi kachawichi?					yes
select_one msrh3	msrh3	Did you use a condom at this time (last sexual intercourse)?	Mwazatishili mupila wa kondomu tahindi?
select_multiple msrh4	msrh4	Why did you use a condom on this occasion?	Mulong’adi mwazatishili kondomu?	Multiple answers possible.	(selected(${msrh3}, '1'))
select_multiple msrh5	msrh5	Why did you NOT use a condom on this occasion (last sexual intercourse)?	Mwabulilidi kuzatisha kondomu?	Multiple answers possible.	(selected(${msrh3}, '2'))
select_one msrh6	msrh6	Have you had any other sexual partner (s) in the past 12 months?	Mwakaminuhu namumbanda mukwawu mutukwezi 12 anahiti tahindi?					yes
select_one msrh7	msrh7	Did you pay or were you paid in money, or in kind, for this sexual intercourse (during sex with other partner)?	Weyala wafweteli madi tahindi mawana hanyima yakukama nindi?		(selected(${msrh6}, '1'))
select_one msrh8	msrh8	Did you use a condom at this time (during sex with other partner)?	Hadiyi mpinji mwazatishili mupila wa kondomu tahindi?		(selected(${msrh6}, '1'))
select_one msrh9	msrh9	Could you ask your spouse/cohabiting partner to use a condom if you wanted to?	Munatweshi kulomba mfum’wenu hela kajila kenu kuzatisha mupila wakondomu neyi munakeng’i tahindi?					yes
select_one msrh10	msrh10	Do you know of a place where a person can get condoms?	Mwelukahu ilung’a kumunatweshi kutambula nyipila yamakondomu tahindi?					yes
select_multiple msrh11	msrh11	Where is that? (a place where one can get a condom)	Dikumu kudihi?		(selected(${msrh10}, '1'))
select_one msrh12	msrh12	Do you feel comfortable buying or asking for a condom?	Chekala chaswayi kulanda hela kulomba nyipila yamakondomu tahindi?		(selected(${msrh10}, '1'))			yes
select_one msrh13	msrh13	During the last 12 months, have you had a disease which you thought or was told you got through sexual contact (STI)?	Mwatambwiluhu musong’u wa uvumbi ha tukweji 12 tunahiti tahindi?					yes
note	mrtb	Respiratory Issues and Tuberculosis	Konashana na musong’u wa muntulu
select_one mrtb1	mrtb1	In the last 2 weeks, have you (ever) coughed?	Mwakatiluhu kakohu hamilungu iyedi inahiti tahindi?					yes
select_one mrtb2	mrtb2	In the last 2 weeks, have you (ever) brought up sputum?	Mwedishahodehi makohola hanyilungu iyedi inahiti tahindi?					yes
begin group	mrtb3	Episodes of lung/respiratory episodes	Kukala kwachampinji chamapwapwa nakonashana						field-list
integer	mrtb3a	During the last 2 weeks, how many very unpleasant episodes of lung/respiratory problems have you had?	Mwakatiluhu ntulu mapampa kang’ahi munyilungu iyedi inahiti?
select_one frtb3b	mrtb3b	If no number specified:	Neyi mapampa kosi, shimunang’a:
end group
select_one mrtb4	mrtb4	Have you been woken in sleep by an attack of shortness of breath at any time in the last 12 months?	Hatukwezhi 12 tunahiti mwahindukiluhu chakwikasumwisha hansang’u yakonashana nawufuku?					yes
select_one mrtb5	mrtb5	Have you been woken in sleep by an attack of coughing at any time in the last 12 months?	Hatukwezhi 12 tunahiti mwahindukiluhu chakwikasumwisha hansang’u yakukohola naufuku tahindi?					yes
select_one mrtb6	mrtb6	Have you ever heard of an illness called Tuberculosis (TB)?	Mwatiyahodehi musong’u wa TB?					yes
select_multiple mrtb7	mrtb7	In your opinion, how can you get TB?	Mukutong’ojoka chenu munatweshi ng’ahi kusambula musong’u wa TB?		(selected(${mrtb6}, '1'))
text	mrtb7o	How else?	How else?		(selected(${mrtb7}, '10'))
select_one mrtb8	mrtb8	Do you think TB is curable?	Musong’u wa TB awukang’a tahindi?		(selected(${mrtb6}, '1'))
select_one mrtb9	mrtb9	Have you or any of your family members been treated for tuberculosis (TB) in the past year?	Mwekalahodehi ni ntang’a hela wachisaka chenu wokewadehi ku musong’u wa TB mu chaka chimu chinahiti?		(selected(${mrtb6}, '1'))
note	msocial	Social determinants of health	Kwesekezha kwa chihandilu cha muzhimba
select_one msdh1	msdh1	Do you drink alcohol?	Mwanwang’a walwa tahindi?					yes
select_one msdh2	msdh2	In the last one week how many days did you drink alcohol?	Mulungu unamani mwanwinumu walwa mafuku ang’ahi?		(selected(${msdh1}, '1'))
select_one msdh3	msdh3	Do you currently smoke cigarettes?	Mwanwang’a makanya tahindi?					yes
integer	msdh4	How many cigarettes did you smoke in the last 24 hours?	Nyisang’a ing’ahi imunapepi ifuku dinahiti?		(selected(${msdh3}, '1'))
integer	msdh5	How many people living in this home/household smoke regularly?	Antu ang’ahi ashakama munu mwitala anwinang’a (kupepa) makanya mwitala?					yes
select_one msdh6	msdh6	How often does anyone smoke inside your house? Would you say daily, weekly, monthly, less than monthly, or never?	Mukwila nenu apepang’a mapampa kang’ahi mwitala? Hefuku hefuku,hamulungu hamulungu, chibalu chakakweji hela kwosi wanwang’a makanya?	Specify INSIDE the house.
select_one msdh7	msdh7	Do you consider drug abuse as a problem in your community?	Mwekala nakukala kwakunwa itumbu yashetana mwilung’a tahindi?					yes
select_one msdh8	msdh8	Is it common in this community that sex is exchanged for money, gifts or favours?	Uvumbi wakufwila mali, mawana hela wuselewa wawuvulu mwilung’a denu tahindi?					yes
begin group	mdv	Domestic violence							field-list
select_one yes_no	msdh9	Sometimes a husband is angry with his wife. In your opinion, is a husband justified to beat his wife in the following situations:	Kwekalang’a mpinji yakwila iyala hakuzuwila ing’odindi. Enu muneteji iyala kweta ing’odindi neyi mumbanda neli Yuma inukutena hano: (tang’aku)	Promt all answers.					label
select_one yes_no	msdh9a	If she goes out without telling him	Neyi nawomboloki:					yes	list-nolabel
select_one yes_no	msdh9b	If she neglects the children	Neyi nakang’anyi kuhemba nyana					yes	list-nolabel
select_one yes_no	msdh9c	If she argues with him	Neyi ukutadika nimfum’windi					yes	list-nolabel
select_one yes_no	msdh9d	If she refuses to have sexual intercourse with him	Neyi ukana kukama ni mfum’windi					yes	list-nolabel
select_one yes_no	msdh9e	If she burns the food	Neyi ukusukumisha chakudisha					yes	list-nolabel
end group
select_one msdh10	msdh10	During the past 12 months have you ever felt insecure or feared for your life in your community?	Mukachi ka chaka chinamani kwading’uhu mpinji yakudakamena hela kutiya woma muwumi wenu amunu mwilung’a tahindi?					yes
select_one msdh11	msdh11	In your opinion, would you say that this community is a place where people look after each other?	Muyitong’ojoka yenu mukutena nawu antu mumukala wenu anakudihemba chachiwahi tahindi?					yes
select_one msdh12	msdh12	Would you say that in general your health is…	Mukwiteja nenu wumi wenu wakola…	Promt all answers.				yes
begin group	mgenhealth	General health and well-being							field-list
integer	msdh13a	During the past 30 days, for about how many days did poor physical or mental health keep you from doing your usual activities, such as self-care, work, or recreation?	Kakweji namani mwakatilumu mafuku ang’ahi chakwila mukang’anya nikuzata?					yes
select_one msdh13b	msdh13b	If no days specified	Neyi mafuku kosi shimunang’a
end group
note	mairnoise	Air and Noise Pollution	Mpepela namazung’u atama
select_one mnoise1	mnoise1	Is there any noise pollution in this area?	Akunu kwilung’a kwekala yivumina yakulendumuka yayinkang’a kukala tahindi?					yes
select_multiple mnoise2	mnoise2	What type of noise pollution is there?	Yivumina yamuchidinyi?		(selected(${mnoise1}, '1'))
text	mnoise3	Which other noise pollution?	Mazung’unyi atama makwawu?		(selected(${mnoise2}, '4'))			yes
select_one mair1	mair1	Is there any air pollution in this area?	Kutama kwamuchidinyi kwenzang’a mumpepela?
select_multiple mair2	mair2	What type of air pollution is there?	Kutama kwamuchidinyi kwenzang’a mumpepela?		(selected(${mair1}, '1'))
text	mair3	Which other air pollution?	Mpepela yatamanyi yikwawu?		(selected(${mair2}, '4'))
text	mcomments	Comments from the male respondent	Comments from the male respondent	Please do never press ENTER when entering text!
note	endfather	THANK YOU A LOT FOR PARTICIPATING IN THIS QUESTIONNAIRE SURVEY. Ask the father to join the rest of his family in the clinical field laboratory.	THANK YOU A LOT FOR PARTICIPATING IN THIS QUESTIONNAIRE SURVEY. Ask the father to join the rest of his family in the clinical field laboratory.
end group	s3
end group	s
text	noconsent	Any comments if no consent was given?	Any comments if no consent was given?	Please do never press ENTER when entering text!	(selected(${consent}, '2'))
geopoint	gis	Record household coordinates	Record household coordinates	Wait for a precision of 5-10m and then press 'Record location'.
time	end_survey	Time survey end	Time survey end	end
text	intcomments	Comments from the interviewer:	Comments of the interviewer:	Please do never press ENTER when entering text!
text	supcomments	Comments from the supervior (i.e. survey management team):	Commentaires du superviseur:	Please do never press ENTER when entering text!

## Sheet: choices
list_name	name	label	label::Lunda
ss	1	Kankonzhi	Kankonzhi
ss	2	Northern Settlement	Northern Settlement
ss	3	Musele I	Musele I
ss	4	Musele II	Musele II
ss	5	Chisasa I	Chisasa I
ss	6	Chisasa II	Chisasa II
ss	7	Nkenyawuli	Nkenyawuli
ss	8	Wamafwa	Wamafwa
ss	9	Chovwe	Chovwe
ss	10	Shenengene	Shenengene
ss	11	Kanzala	Kanzala
ss	12	Chitungu	Chitungu
ss	13	Kambishi	Kambishi
ss	14	Mubenji (Holy Family)	Mubenji (Holy Family)
ss	15	Kanzhaji	Kanzhaji
ss	16	Kalumbila Town	Kalumbila Town
interviewer	1	Leo	Leo
interviewer	2	Simeon	Simeon
interviewer	3	Florence	Florence
interviewer	4	Everlyn	Everlyn
interviewer	5	Jonathan	Jonathan
interviewer	6	Kelvin	Kelvin
interviewer	7	Christerbel	Christerbel
interviewer	8	Name 8	Name 8
interviewer	9	Name 9	Name 9
consent	1	Yes	Eng’a
consent	2	No	Nehi
hh_age2	88	unknown	Not known
hh_age2	99	missing	missing
hh_sex	1	Male	Mumbanda
hh_sex	2	Female	Iyala
hh_religion	1	Pentecostal	Pentecostal
hh_religion	2	Evangelist	Evangelist
hh_religion	3	Adventist	Adventist
hh_religion	4	Muslim	Muslim
hh_religion	5	Catholic	Catholic
hh_religion	6	Other	Other
hh_religion	88	unknown	unknown
hh_religion	99	missing	missing
hh_ethnie	1	Kaonde	Kaonde
hh_ethnie	2	Lunda	Lunda
hh_ethnie	3	Luvale	Luvale
hh_ethnie	4	Bemba	Bemba
hh_ethnie	5	Njanja	Njanja
hh_ethnie	6	Lamba	Lamba
hh_ethnie	7	Tonga	Tonga
hh_ethnie	8	Mixed	Adibomba (mixed)
hh_ethnie	9	Other ethnie or country	Nyichidi yacheng’i / acheng’i
hh_ethnie	88	unknown	unknown
hh_ethnie	99	missing	missing
hh_education	1	None / Didn't attend school	None / Didn't attend school
hh_education	2	Pre-primary school	Pre-primary school
hh_education	3	Primary incomplete	Primary incomplete
hh_education	4	Primary complete	Primary complete
hh_education	5	Secondary incomplete	Secondary incomplete
hh_education	6	Secondary complete	Secondary complete
hh_education	7	Post secondary	Post secondary
hh_education	8	University	University
hh_education	88	unknown	unknown
hh_education	99	missing	missing
respast	1	Lumwana	Lumwana
respast	2	Solwezi	Solwezi
respast	3	Other area/place in the Northwestern Province	Other area/place in the Northwestern Province
respast	4	Chingola/Kitwe	Chingola/Kitwe
respast	5	Ndola	Ndola
respast	6	Lusaka	Lusaka
respast	7	Other area/place in Zambia	Other area/place in Zambia
respast	8	DRC	DRC
respast	9	Other country	Other country
respast	88	unknown	unknown
respast	99	missing	missing
relocation	1	Job-seeking, labour	Kukeng’a mudimu, labour
relocation	2	Job-seeking, artisanal mining	Kukeng’a mudimu, artisanal mining
relocation	3	Family reunification	Kufunta kuchisaka chami
relocation	4	Fleeing from previous place	Kutemuka kufuma kwilung’a
relocation	5	Service provider to the project	Kuhana ukwashi kumudimu
relocation	6	Former resident to the area	Kufunta kumukala wamwaka
relocation	7	Provider of goods and services to the local population	Kwinza nakulandisha Yuma kudi akamukala
relocation	8	Resettlement	Resettlement
relocation	9	No particular reason(s)	Kwinza nakukimboka hohu
relocation	10	Not sure	Neluki wanyi
relocation	11	Other	Ikwawu
relocation	88	unknown	unknown
relocation	99	missing	missing
resettle1	1	Yes	Eng’a
resettle1	2	No	Nehi
resettle1	88	unknown	unknown
resettle1	99	missing	missing
resettle2	1	Wanyinwa	Wanyinwa
resettle2	2	Mukila Wantambo	Mukila Wantambo
resettle2	3	Musangezhi	Musangezhi
resettle2	4	Chiwilu	Chiwilu
resettle2	5	Nyanga	Nyanga
resettle2	6	Other	Other
resettle2	88	unknown	unknown
resettle2	99	missing	missing
emp1	0	0	0
emp1	1	1	1
emp1	2	2	2
emp1	3	3	3
emp1	4	4	4
emp1	5	5	5
emp1	6	6	6
employer1	1	Kalumbila mine / FQML	Kalumbila mine / FQML
employer1	2	FQML	FQML
employer1	3	Kansanshi mine	Kansanshi mine
employer1	4	Lumwana mine	Lumwana mine
employer1	5	Other mine	Other mine
employer1	6	Contractor Omega	Contractor Omega
employer1	7	Contractor Titan	Contractor Titan
employer1	8	Contractor Quattro	Contractor Quattro
employer1	9	Contractor Kalpatru	Contractor Kalpatru
employer1	10	Contractor Sandon	Contractor Sandon
employer1	11	Contractor Orica	Contractor Orica
employer1	12	Other contractor	Other contractor
employer1	13	Government	Government
employer1	14	NGO	NGO
employer1	15	Other	Other
employer1	88	unknown	unknown
employer1	99	missing	missing
employer1p	1	Full-time	Full-time
employer1p	2	Part-time	Part-time
employer1p	3	Seasonal	Seasonal
employer1p	88	unknown	unknown
employer1p	99	missing	missing
employer2	1	Kalumbila mine / FQML	Kalumbila mine / FQML
employer2	2	FQML	FQML
employer2	3	Kansanshi mine	Kansanshi mine
employer2	4	Lumwana mine	Lumwana mine
employer2	5	Other mine	Other mine
employer2	6	Contractor Omega	Contractor Omega
employer2	7	Contractor Titan	Contractor Titan
employer2	8	Contractor Quattro	Contractor Quattro
employer2	9	Contractor Kalpatru	Contractor Kalpatru
employer2	10	Contractor Sandon	Contractor Sandon
employer2	11	Contractor Orica	Contractor Orica
employer2	12	Other contractor	Other contractor
employer2	13	Government	Government
employer2	14	NGO	NGO
employer2	15	Other	Other
employer2	88	unknown	unknown
employer2	99	missing	missing
employer2p	1	Full-time	Full-time
employer2p	2	Part-time	Part-time
employer2p	3	Seasonal	Seasonal
employer2p	88	unknown	unknown
employer2p	99	missing	missing
employer3	1	Kalumbila mine / FQML	Kalumbila mine / FQML
employer3	2	FQML	FQML
employer3	3	Kansanshi mine	Kansanshi mine
employer3	4	Lumwana mine	Lumwana mine
employer3	5	Other mine	Other mine
employer3	6	Contractor Omega	Contractor Omega
employer3	7	Contractor Titan	Contractor Titan
employer3	8	Contractor Quattro	Contractor Quattro
employer3	9	Contractor Kalpatru	Contractor Kalpatru
employer3	10	Contractor Sandon	Contractor Sandon
employer3	11	Contractor Orica	Contractor Orica
employer3	12	Other contractor	Other contractor
employer3	13	Government	Government
employer3	14	NGO	NGO
employer3	15	Other	Other
employer3	88	unknown	unknown
employer3	99	missing	missing
employer3p	1	Full-time	Full-time
employer3p	2	Part-time	Part-time
employer3p	3	Seasonal	Seasonal
employer3p	88	unknown	unknown
employer3p	99	missing	missing
employer4	1	Kalumbila mine / FQML	Kalumbila mine / FQML
employer4	2	FQML	FQML
employer4	3	Kansanshi mine	Kansanshi mine
employer4	4	Lumwana mine	Lumwana mine
employer4	5	Other mine	Other mine
employer4	6	Contractor Omega	Contractor Omega
employer4	7	Contractor Titan	Contractor Titan
employer4	8	Contractor Quattro	Contractor Quattro
employer4	9	Contractor Kalpatru	Contractor Kalpatru
employer4	10	Contractor Sandon	Contractor Sandon
employer4	11	Contractor Orica	Contractor Orica
employer4	12	Other contractor	Other contractor
employer4	13	Government	Government
employer4	14	NGO	NGO
employer4	15	Other	Other
employer4	88	unknown	unknown
employer4	99	missing	missing
employer4p	1	Full-time	Full-time
employer4p	2	Part-time	Part-time
employer4p	3	Seasonal	Seasonal
employer4p	88	unknown	unknown
employer4p	99	missing	missing
employer5	1	Kalumbila mine / FQML	Kalumbila mine / FQML
employer5	2	FQML	FQML
employer5	3	Kansanshi mine	Kansanshi mine
employer5	4	Lumwana mine	Lumwana mine
employer5	5	Other mine	Other mine
employer5	6	Contractor Omega	Contractor Omega
employer5	7	Contractor Titan	Contractor Titan
employer5	8	Contractor Quattro	Contractor Quattro
employer5	9	Contractor Kalpatru	Contractor Kalpatru
employer5	10	Contractor Sandon	Contractor Sandon
employer5	11	Contractor Orica	Contractor Orica
employer5	12	Other contractor	Other contractor
employer5	13	Government	Government
employer5	14	NGO	NGO
employer5	15	Other	Other
employer5	88	unknown	unknown
employer5	99	missing	missing
employer5p	1	Full-time	Full-time
employer5p	2	Part-time	Part-time
employer5p	3	Seasonal	Seasonal
employer5p	88	unknown	unknown
employer5p	99	missing	missing
employer6	1	Kalumbila mine / FQML	Kalumbila mine / FQML
employer6	2	FQML	FQML
employer6	3	Kansanshi mine	Kansanshi mine
employer6	4	Lumwana mine	Lumwana mine
employer6	5	Other mine	Other mine
employer6	6	Contractor Omega	Contractor Omega
employer6	7	Contractor Titan	Contractor Titan
employer6	8	Contractor Quattro	Contractor Quattro
employer6	9	Contractor Kalpatru	Contractor Kalpatru
employer6	10	Contractor Sandon	Contractor Sandon
employer6	11	Contractor Orica	Contractor Orica
employer6	12	Other contractor	Other contractor
employer6	13	Government	Government
employer6	14	NGO	NGO
employer6	15	Other	Other
employer6	88	unknown	unknown
employer6	99	missing	missing
employer6p	1	Full-time	Full-time
employer6p	2	Part-time	Part-time
employer6p	3	Seasonal	Seasonal
employer6p	88	unknown	unknown
employer6p	99	missing	missing
rooms	1	1	1
rooms	2	2	2
rooms	3	3	3
rooms	4	4	4
rooms	5	5	5
rooms	6	6	6
rooms	7	more than 6	more than 6
rooms	88	unknown	unknown
rooms	99	missing	missing
sleep	1	1	1
sleep	2	2	2
sleep	3	3	3
sleep	4	4	4
sleep	7	more than 4	more than 4
sleep	88	unknown	unknown
sleep	99	missing	missing
yes_no	1	Yes	Eng’a
yes_no	2	No	Nehi
yes_no_dk	1	Yes	Eng’a
yes_no_dk	2	No	Nehi
yes_no_dk	3	Don't know	Neluki wanyi
floor	1	Natural floor: earth, sand, dung	Natural floor; maseki, usekulula, maseki nituji twawang’ombi
floor	2	Rudimentary floor: wood, planks	Rudimentary floor; wood, planks
floor	3	Rudimentary floor: palm, bamboo, reeds	Rudimentary floor; palm, bamboo, reeds
floor	4	Finished floor: parquet or polished wood	Finished floor; parquet or polished wood
floor	5	Finished floor: vinyl or asphalt	Finished floor: vinyl or asphalt
floor	6	Finished floor: ceramic, terrazzo tiles	Finished floor: ceramic, terrazzo tiles
floor	7	Concrete cement	Concrete cement
floor	8	Carpet (fixed)	Carpet (fixed)
floor	88	unknown	unknown
floor	99	missing	missing
wall	1	Rudimentary walls: wood, mud	Rudimentary walls (wood and mud)
wall	2	Solid walls: bricks, cement, stones	Solid walls (bricks, cement, stones)Tumenga, malola
wall	88	unknown	unknown
wall	99	missing	missing
roof	1	Rudimentary roof: grass, thatch, straw, palm leaves	Rudimentary roof (grass, thatch, straw, palm leaves) Matahu
roof	2	Solid roof: corrugated sheets, cement, bricks, asbestos	Solid roof (corrugated sheets, cement, bricks, asbestos)Malata
roof	88	unknown	unknown
roof	99	missing	missing
fuel	1	Electricity (any)	Kesi kamalaiti
fuel	2	Gas	Gas
fuel	3	Kerosene, paraffin	Manzhi aparrafin
fuel	4	Straw, gras, dung	Matahu, tuji twawang’ombi
fuel	5	Charcoal	Malasha
fuel	6	Firewood	Chawa
fuel	7	Other	Ikwawu
fuel	88	unknown	unknown
fuel	99	missing	missing
cook	1	In the house	Mukachi ketala
cook	2	In a separate building	Ketala kadimena
cook	3	Outside	Hanzhi
cook	4	Other	Ikwawu
cook	88	unknown	unknown
cook	99	missing	missing
energy	1	Kerosene	Manzhi aparrafin
energy	2	Battery cells	Malola akesi
energy	3	Gas	Gas
energy	4	Candels	Kandulu
energy	5	Electricity (any)	Kesi kamalaiti (mains)
energy	6	Generator	Ikina damalaiti
energy	7	Solar panel	Kesi kamutena (Solar)
energy	8	Firewood	Nchawa
energy	9	Other	Ikwawu
energy	88	unknown	unknown
energy	99	missing	missing
services	1	0-14 minutes	0-14 minutes
services	2	15-29 minutes	15-29 minutes
services	3	30-44 minutes	30-44 minutes
services	4	45-59 minutes	45-59 minutes
services	5	60 or more minutes	60 or more minutes
services	88	unknown	unknown
services	99	missing	missing
sourced	1	Rain water	Rain water
sourced	2	Protected public well	Protected public well
sourced	3	Borehole with stand pipe	Borehole with stand pipe
sourced	4	Public tap water	Public tap water
sourced	5	Lake, river, spring	Lake, river, spring
sourced	6	Open public well	Open public well
sourced	7	Piped water into dwelling/yard	Piped water into dwelling/yard
sourced	8	Bottled water (purchased)	Bottled water (purchased)
sourced	9	Other	Ikwawu
sourced	88	unknown	unknown
sourced	99	missing	missing
sourcer	1	Rain water	Rain water
sourcer	2	Protected public well	Protected public well
sourcer	3	Borehole with stand pipe	Borehole with stand pipe
sourcer	4	Public tap water	Public tap water
sourcer	5	Lake, river, spring	Lake, river, spring
sourcer	6	Open public well	Open public well
sourcer	7	Piped water into dwelling/yard	Piped water into dwelling/yard
sourcer	8	Bottled water (purchased)	Bottled water (purchased)
sourcer	9	Other	Ikwawu
sourcer	88	unknown	unknown
sourcer	99	missing	missing
wtreat	1	No treatment	Kwosi
wtreat	2	Boiling	Kuteleka
wtreat	3	Add bleach/chlorine	Kubomba yitumbu ya chlorine
wtreat	4	Water filter: ceramic, sand	Kuzatisha lunyungu (ceramic, sand)
wtreat	5	Solar disinfection	Kutenteka hamwana
wtreat	6	Let it stand and settle	Kuyitenteka mpinji yailehi
wtreat	7	Strain through a cloth	Kuzatisha ihina
wtreat	8	Other	Ikwawu
wtreat	88	unknown	unknown
wtreat	99	missing	missing
toilet1	1	Yes	Eng’a
toilet1	2	No	Nehi
toilet1	88	unknown	unknown
toilet1	99	missing	missing
toilet2	1	Flushed toilet	Chimbushu cha menzhi
toilet2	2	Ventilated improved latrine	Chimbushu chikweti mupaipi
toilet2	3	Pit latrine with slab/covered	Chimbushu chakwenzela na konkili
toilet2	4	Open pit latrine	Chimbushu chakwezununa hewulu
toilet2	5	Bucket	Mungomu
toilet2	6	Other	Ikwawu
toilet2	88	unknown	unknown
toilet2	99	missing	missing
toilet3	1	Yes	Eng’a
toilet3	2	No	Nehi
toilet3	88	unknown	unknown
toilet3	99	missing	missing
toilet4	1	Shared latrine	Chimbushu chawantu amavulu
toilet4	2	River, lake	Kalong’a/Kalungalwizhi
toilet4	3	Bush	Mwisang’a
toilet4	4	Bury in the soil	Kupunda hamaseki nikuzhikila
toilet4	5	Other	Ikwawu
toilet4	88	unknown	unknown
toilet4	99	missing	missing
soap	1	Yes, and soap seen	Eng’a njapawu (soap) inamwekani
soap	2	Yes, but soap not seen	Eng’a njapawu,(soap) kumwekana nehi
soap	3	No	Nehi
soap	88	unknown	unknown
soap	99	missing	missing
itn1	1	Yes	Eng’a
itn1	2	No	Nehi
itn1	88	unknown	unknown
itn1	99	missing	missing
itn2	1	Not necessary	Yatelela wanyi
itn2	2	Not available to buy	Kwosi kwa kulanda
itn2	3	Not been distributed	Atwinkazhu wanyi
itn2	4	Don't like	Nayikeng’a wanyi
itn2	5	Cannot afford	Nukuyitwesha wanyi
itn2	6	Using something else	Nazatishang’a nzhila yacheng’i
itn2	7	Other	Neluki wanyi
itn2	88	unknown	unknown
itn2	99	missing	missing
itn4	1	Health post	Chipateli chanyanya
itn4	2	Government distribution	Atwinkeli kumfulumendi
itn4	3	KML	Atwinkeli aka KML
itn4	4	Self purchased	Nalandili
itn4	5	NGO distribution	Atwinkeli aka NGO
itn4	6	Other	Ikwawu
itn4	88	unknown	unknown
itn4	99	missing	missing
agef2	88	unknown	unknown
agef2	99	missing	missing
maritalf	1	Married	Nasumbuka
maritalf	2	Living in a partnership, not married	Twashakama ho hamu
maritalf	3	Single (never married)	Hinasumbukaku(never married)
maritalf	4	Divorced	wadiseng’adehi
maritalf	5	Separated	Twadambula
maritalf	6	Widow	Ntuluwa
maritalf	88	unknown	unknown
maritalf	99	missing	missing
eduf	1	None / Didn't attend school	Nayili wanyi kushikola
eduf	2	Pre-primary school	Pre-primary school
eduf	3	Primary incomplete	Primary incomplete
eduf	4	Primary complete	Primary complete
eduf	5	Secondary incomplete	Secondary incomplete
eduf	6	Secondary complete	Secondary complete
eduf	7	Post secondary	Post secondary
eduf	8	University	University
eduf	88	unknown	unknown
eduf	99	missing	missing
occupf	1	I currently do not work (no principal activity)	Nazatang’a wanyi (no principal activity)
occupf	2	Agriculture (farming, livestock)	Agriculture (farming, livestock)
occupf	3	Mining company: Kalumbila	Mining company: Kalumbila / FQML
occupf	4	Mining company: Kansanshi	Mining company: Kansanshi
occupf	5	Mining company: Lumwana	Mining company: Lumwana
occupf	6	Mining company: Other	Mining company: Other
occupf	7	Contractor Omega	Contractor Omega
occupf	8	Contractor Titan	Contractor Titan
occupf	9	Contractor Quattro	Contractor Quattro
occupf	10	Contractor Kalpatru	Contractor Kalpatru
occupf	11	Contractor Sandon	Contractor Sandon
occupf	12	Contractor Orica	Contractor Orica
occupf	13	Government employee	Government employee
occupf	14	NGO employee	NGO employee
occupf	15	Sales and services (incl. small businesses)	Sales and services (incl. small businesses)
occupf	16	Manual labour	Manual labour
occupf	17	Other	Ikwawu
occupf	88	unknown	unknown
occupf	99	missing	missing
ageb2	88	unknown	unknown
ageb2	99	missing	missing
anc1	1	Yes	Eng’a
anc1	2	No	Nehi
anc1	3	Don't remember	Neluki wanyi
anc1	88	unknown	unknown
anc1	99	missing	missing
anc2	1	Local health clinic (public)	Chipateli (public)
anc2	2	Other public health facility	Other public health facility
anc2	3	Private health facility	Chipateli chawantu (private)
anc2	4	Missionary health facility	Chipateli chawa Missionary
anc2	5	Other	Ikwawu
anc2	88	unknown	unknown
anc2	99	missing	missing
anc3	1	Once	Once
anc3	2	Twice	Twice
anc3	3	Three times	Three times
anc3	4	Four times	Four times
anc3	5	More than four times	More than four times
anc3	6	Don't remember	Don't remember
anc3	88	unknown	unknown
anc3	99	missing	missing
anc4	1	Yes	Eng’a
anc4	2	No	Nehi
anc4	3	Don't remember	Nanuki wanyi
anc4	88	unknown	unknown
anc4	99	missing	missing
anc5	1	Yes	Eng’a
anc5	2	No	Nehi
anc5	3	Don't remember	Nanuki wanyi
anc5	88	unknown	unknown
anc5	99	missing	missing
birth1	1	Local clinic (public)	Chipateli (public)
birth1	2	Other public health facility	Other public health facility
birth1	3	Private health facility	Chipateli chawantu (private)
birth1	4	Missionary health facility	Chipateli chawa Missionary
birth1	5	At home	Kwitala
birth1	6	Other	Ikwawu
birth1	88	unknown	unknown
birth1	99	missing	missing
birth2	1	Cannot afford the cost	Kutwesha kufweta nehi
birth2	2	Facility was not open	Chipateli chakwenzela
birth2	3	Too far, no transportation	Kwakulehi/ Kwosi transportation
birth2	4	Not satisfied with the services at the facility	Akwanyidimu azatang’a chiwahi wanyi
birth2	5	No female provider at the facility	Kwosi nkong’u wamumbanda
birth2	6	No permission from partner/family to go to the facility	Wang’itezha wanyi mfumwami/chisaka
birth2	7	Not necessary	Chalema wanyi
birth2	8	Other	Ikwawu
birth2	88	unknown	unknown
birth2	99	missing	missing
delivery	1	Medical doctor	Ndotolu
delivery	2	Clinical officer / assistant CO	Clinical officer / assistant CO
delivery	3	Nurse, midwife	Nurse, midwife
delivery	4	MCH aide	MCH aide
delivery	5	Traditional birth attendant	Nkong’u wakamukala
delivery	6	Family memeber, friend	Antang’a, bwambu dami
	7	Other:	Ikwawu
delivery	88	unknown	unknown
delivery	99	missing	missing
bf	1	Not breastfed at all	Not breastfed at all
bf	2	Less than 1 months	Less than 1 months
bf	3	1-2 months	1-2 months
bf	4	3-6 months	3-6 months
bf	5	6 months or more	6 months or more
bf	6	Don't remember	Don't remember
bf	7	Still on breastmilk solely	Still on breastmilk solely
bf	88	unknown	unknown
bf	99	missing	missing
vacc	1	Yes, card seen	Eng’a, card inamwekani
vacc	2	Yes, but card not seen	Eng’a, card kumwekana nehi
vacc	3	No vaccination card	Card kumwekana nehi
vacc	88	unknown	unknown
vacc	99	missing	missing
diarr1	1	Yes	Eng’a
diarr1	2	No	Nehi
diarr1	3	Don't remember	Nanuki wanyi
diarr1	88	unknown	unknown
diarr1	99	missing	missing
ari1	1	Yes	Eng’a
ari1	2	No	Nehi
ari1	3	Don't remember	Nanuki wanyi
ari1	88	unknown	unknown
ari1	99	missing	missing
ari2	1	Yes	Eng’a
ari2	2	No	Nehi
ari2	3	Don't remember	Nanuki wanyi
ari2	88	unknown	unknown
ari2	99	missing	missing
ari3	1	Yes	Eng’a
ari3	2	No	Nehi
ari3	3	Don't remember	Nanuki wanyi
ari3	88	unknown	unknown
ari3	99	missing	missing
hsb1	1	Local clinic (public)	Chipateli (public)
hsb1	2	Other public health facility	Other public health facility
hsb1	3	Private health facility	Chipateli chawantu (private)
hsb1	4	Missionary health facility	Chipateli chawa Missionary
hsb1	5	KML mobile health unit	KML mobile health unit
hsb1	6	KML workplace health facility	KML workplace health facility
hsb1	7	Pharmacy	Pharmacy
hsb1	8	Shop, kiosk, market	Shop, kiosk, market
hsb1	9	Self-medication with herbal remedy	Namwinkeli itumbu kwitala
hsb1	10	Parents, friends	Amvwali/mabwambu
hsb1	11	Traditional healer	Mukwakuka
hsb1	12	Church, mosque, temple (clerical)	Church, mosque, temple (clerical)
hsb1	13	Didn't do anything	Kwosi kunayili
hsb1	14	Other	Ikwawu
hsb1	88	unknown	unknown
hsb1	99	missing	missing
hsb2	1	Accesibility: I do not have access to a health facility	Accessibility: Nukutwesha kuya kuchipateli wanyi
hsb2	2	Acceptability: I do not like the health facility	Acceptability: Chipateli nachikeng’a wanyi
hsb2	3	Affordability: I do not have the money to go to the health facility	Affordability: Nidi namali wanyi akukandamisha
hsb2	4	I prefer to go to the traditional healer	Nakeng’a ayimbanda
hsb2	5	I prefer to self-treat	Nakeng’a kuduka ami aweni
hsb2	6	I prefer faith based healing	Nakeng’ akakunlembelela
hsb2	7	It is not necessary for me to visit the health facility	Chantelela wanyi kuya ku chipateli
hsb2	8	I did not get the permission to go to a health facility	Nalombi lusesa lwakuya kuchipateli wanyi
hsb2	9	Other	Ikwawu
hsb2	88	unknown	unknown
hsb2	99	missing	missing
hsb3	1	Yes	Eng’a
hsb3	2	No	Nehi
hsb3	88	unknown	unknown
hsb3	99	missing	missing
fint1	1	Yes	Eng’a
fint1	2	No	Nehi
fint2	1	Yes	Eng’a
fint2	2	No	Nehi
fint3	1	Yes	Eng’a
fint3	2	No	Nehi
fint4	1	Yes	Eng’a
fint4	2	No	Nehi
fint5	1	Yes	Eng’a
fint5	2	No	Nehi
fint6	1	Yes	Eng’a
fint6	2	No	Nehi
fint7	1	Yes	Eng’a
fint7	2	No	Nehi
fint8	1	Yes	Eng’a
fint8	2	No	Nehi
fint9	1	Yes	Eng’a
fint9	2	No	Nehi
fint10	1	Yes	Eng’a
fint10	2	No	Nehi
fimp	1	Kalumbila mine / FQM	Kalumbila mine / FQM
fimp	2	Government, Ministry of Health	Government, Ministry of Health
fimp	3	NGO	NGO
fimp	4	Other	Other
fimp	88	unknown	unknown
fimp	99	missing	missing
fmalaria1	1	Yes	Eng’a
fmalaria1	2	No	Nehi
fmalaria1	99	missing	missing
fmalaria2	1	Working in the sun	Kushakama hamwaana
fmalaria2	2	Being in the rain	Kuzowa namvula
fmalaria2	3	When it’s cold	Nsang’u yamashika
fmalaria2	4	Fly bites	Kuyisuma kudi anzhinzhi
fmalaria2	5	Eating mangoes	Kudya zhimbuma
fmalaria2	6	Mosquito bites	Kuyisuma kudi anweneni
fmalaria2	7	Bites of other insects	Kuyisuma kudi atububu
fmalaria2	8	Drinking milk	Kunwa mayeli
fmalaria2	9	Eating sugary food	Kudya yakudya yatowala
fmalaria2	10	Drinking beer	Kunwa walwa
fmalaria2	11	Dirty environment	Ilung’a da mazhilu
fmalaria2	12	Drinking dirty water	Kunwa menzhi amajilu
fmalaria2	13	From another person that has malaria	Kufuma kudi antu akata mashika (malaria)
fmalaria2	14	Don’t know	Neluki wanyi
fmalaria2	15	Other	Ikwawu
fmalaria2	88	unknown	unknown
fmalaria2	99	missing	missing
fmalaria3	1	Sleeping under a mosquito net	Kuzatisha nyishikitena
fmalaria3	2	Avoiding mosquito bites	Kukang’esha anweneni kuyisuma
fmalaria3	3	Taking medicine	Kunwa yitumbu
fmalaria3	4	Using coils	Kuzatisha yitumbu yakochela mwitala
fmalaria3	5	Using insecticide spray	Kusansa yitumbu mumatala
fmalaria3	6	Avoid getting cold	Kutemuka mashika
fmalaria3	7	Avoid being in the sun too long	Kushakama muulelu
fmalaria3	8	Keep the surrounds of the house clean	Kuwahisha hamatala
fmalaria3	9	Drinking clean water	Kunwa menzhi amawahi
fmalaria3	10	Close windows and doors	Kwenzela yisu ni mawindow
fmalaria3	11	Use mosquito repellents	Kuzatisha yitumbu yakuhang’a nweneni
fmalaria3	12	Use traditional plants	Kuzatisha yitumbu ya nshinkulu
fmalaria3	14	Don’t know	Neluki wanyi
fmalaria3	15	Other	Ikwawu
fmalaria3	88	unknown	unknown
fmalaria3	99	missing	missing
fmalaria4	1	Local clinic (public)	Chipateli (public)
fmalaria4	2	Other public health facility	Other public health facility
fmalaria4	3	Private health facility	Chipateli chawantu (private)
fmalaria4	4	Missionary health facility	Chipateli chawa Missionary
fmalaria4	5	KML mobile health unit	KML mobile health unit
fmalaria4	6	KML workplace health facility	KML workplace health facility
fmalaria4	7	Pharmacy	Pharmacy
fmalaria4	8	Malaria agent	Malaria agent
fmalaria4	9	Shop, kiosk, market	Shop, kiosk, market
fmalaria4	10	Self-medication with herbal remedy	Namwinkeli itumbu kwitala
fmalaria4	11	Parents, friends	Amvwali/mabwambu
fmalaria4	12	Traditional healer	Mukwakuka
fmalaria4	13	Church, mosque, temple (clerical)	Church, mosque, temple (clerical)
fmalaria4	14	Didn't do anything	Kwosi kunayili
fmalaria4	14	Other	Ikwawu
fmalaria4	88	unknown	unknown
fmalaria4	99	missing	missing
fmalaria5	1	Within 24 hours	Mukachi ka maora 24
fmalaria5	2	2-3 days	Mafuku ayedi hela asatu (2-3 days)
fmalaria5	3	4-6 days	Mafuku awana hela atanu nadimu (4- 6 days )
fmalaria5	4	7 days or more	mafuku atanu nayedi( 7 days or more )
fmalaria5	5	Don't know	Nanuki wanyi/Neluki wanyi
fmalaria5	99	missing	missing
fmalaria6	1	Blood test (microscopy or rapid diagnostic test (RDT))	Kupima mashi
fmalaria6	2	Based on symptoms	Kulondela yinjikjilu
fmalaria6	3	Don't know, don't remember	Nanuki wanyi/Neluki wanyi
fmalaria6	99	missing	missing
fmalaria7	1	Coartem	Coartem
fmalaria7	2	Fansidar	Fansidar
fmalaria7	3	Chloroqine	Chloroqine
fmalaria7	4	Quinine	Quinine
fmalaria7	5	Panadol	Panadol
fmalaria7	6	Other	Other
fmalaria7	7	Don't know, don't remember	Nanuki wanyi/Neluki wanyi
fmalaria7	99	missing	missing
fmalaria8	1	Yes	Eng’a
fmalaria8	2	No	Nehi
fmalaria8	3	Don't remember	Neluki wanyi
fmalaria8	99	missing	missing
fmalaria9	1	Reduce the number of mosquitoes in the house	Reduce the number of mosquitoes in the house
fmalaria9	2	Kills other insects in the house	Kills other insects in the house
fmalaria9	3	Less malaria	Less malaria
fmalaria9	4	Other	Other
fmalaria9	99	missing	missing
fmalaria10	1	Yes	Eng’a
fmalaria10	2	No	Nehi
fmalaria10	99	missing	missing
fmalaria11	1	Bad smell	Bad smell
fmalaria11	2	Inconvenience	Inconvenience
fmalaria11	3	Mess on the floor and in the house	Mess on the floor and in the house
fmalaria11	4	Damage to the belonging	Damage to the belonging
fmalaria11	5	Excites other insects	Excites other insects
fmalaria11	6	Spray-men's conduct	Spray-men's conduct
fmalaria11	7	Discoloouring of walls	Discoloouring of walls
fmalaria11	8	Other	Other
fmalaria11	99	missing	missing
fhiv1	1	Yes	Eng’a
fhiv1	2	No	Nehi
fhiv1	99	missing	missing
fhiv2	1	Yes	Eng’a
fhiv2	2	No	Nehi
fhiv2	99	missing	missing
fhivprev1	1	Yes	Eng’a
fhivprev1	2	No	Nehi
fhivprev1	3	Don't know	Nanuki wanyi
fhivprev1	99	missing	missing
fhivprev2	1	Yes	Eng’a
fhivprev2	2	No	Nehi
fhivprev2	3	Don't know	Nanuki wanyi
fhivprev2	99	missing	missing
fhivprev3	1	Yes	Eng’a
fhivprev3	2	No	Nehi
fhivprev3	3	Don't know	Nanuki wanyi
fhivprev3	99	missing	missing
fhivprev4	1	Yes	Eng’a
fhivprev4	2	No	Nehi
fhivprev4	3	Don't know	Nanuki wanyi
fhivprev4	99	missing	missing
fhivprev5	1	Yes	Eng’a
fhivprev5	2	No	Nehi
fhivprev5	3	Don't know	Nanuki wanyi
fhivprev5	99	missing	missing
fhivprev6	1	Yes	Eng’a
fhivprev6	2	No	Nehi
fhivprev6	3	Don't know	Nanuki wanyi
fhivprev6	99	missing	missing
fhivprev7	1	Yes	Eng’a
fhivprev7	2	No	Nehi
fhivprev7	3	Don't know	Nanuki wanyi
fhivprev7	99	missing	missing
fmtct1	1	Yes	Eng’a
fmtct1	2	No	Nehi
fmtct1	3	Don't know	Nanuki wanyi
fmtct1	99	missing	missing
fmtct2	1	Yes	Eng’a
fmtct2	2	No	Nehi
fmtct2	3	Don't know	Nanuki wanyi
fmtct2	99	missing	missing
fmtct3	1	Yes	Eng’a
fmtct3	2	No	Nehi
fmtct3	3	Don't know	Nanuki wanyi
fmtct3	99	missing	missing
fhivprev8	1	Yes	Eng’a
fhivprev8	2	No	Nehi
fhivprev8	3	Don't know	Nanuki wanyi
fhivprev8	99	missing	missing
fhiva1	1	Yes	Eng’a
fhiva1	2	No	Nehi
fhiva1	3	Don't know	Nanuki wanyi
fhiva1	99	missing	missing
fhiva2	1	Yes	Eng’a
fhiva2	2	No	Nehi
fhiva2	3	Don't know	Nanuki wanyi
fhiva2	99	missing	missing
fhiva3	1	Yes	Eng’a
fhiva3	2	No	Nehi
fhiva3	3	Don't know	Nanuki wanyi
fhiva3	99	missing	missing
fvct1	1	Yes	Eng’a
fvct1	2	No	Nehi
fvct1	3	Refuses to answer	Nanuki wanyi
fvct1	99	missing	missing
fvct2	1	Local clinic (public)	Chipateli (public)
fvct2	2	Other public health facility	Other public health facility
fvct2	3	Private health facility	Chipateli chawantu (private)
fvct2	4	Missionary health facility	Chipateli chawa Missionary
fvct2	5	KML mobile health unit	KML mobile health unit
fvct2	6	KML workplace health facility	KML workplace health facility
fvct2	7	Other	Ikwawu
fvct2	88	unknown	unknown
fvct2	99	missing	missing
fvct3	1	Accessibility: I cannot access a place to take a test	Accessibility: Kwosi kwakuya nakupimisha
fvct3	2	Acceptability: I do not like the testing service	Acceptability: Nakeng’a kupimisha wanyi
fvct3	3	Affordability: I do not have the money for testing	Affordability: Nidi namali wanyi akufweta
fvct3	4	I’m scared of the test / to know the result	Natiyang’a woma kupimisha / to know the result
fvct3	5	I don’t need to take a test	Nachikeng’a wanyi
fvct3	6	Partner objects to testing	Mukwetu wakanishang’a
fvct3	7	Religious resasons	Religious resasons
fvct3	8	I haven’t decided yet	Kanda nitong’ojoki
fvct3	9	I don't know	Neluki wanyi
fvct3	10	Refuses to answer	Refuses to answer
fvct3	11	Other	Ikwawu
fvct3	99	missing	missing
fvct4	1	Local clinic (public)	Chipateli (public)
fvct4	2	Other public health facility	Other public health facility
fvct4	3	Private health facility	Chipateli chawantu (private)
fvct4	4	Missionary health facility	Chipateli chawa Missionary
fvct4	5	KML mobile health unit	KML mobile health unit
fvct4	6	KML workplace health facility	KML workplace health facility
fvct4	7	Pharmacy	Pharmacy
fvct4	8	Shop, kiosk, market	Shop, kiosk, market
fvct4	9	Self-medication with herbal remedy	Namwinkeli itumbu kwitala
fvct4	10	Parents, friends	Amvwali/mabwambu
fvct4	11	Traditional healer	Mukwakuka
fvct4	12	Church, mosque, temple (clerical)	Church, mosque, temple (clerical)
fvct4	13	There is nowhere to go	Kwosi kunayili
fvct4	14	Other	Ikwawu
fvct4	88	unknown	unknown
fvct4	99	missing	missing
fhiviec1	1	Yes	Eng’a
fhiviec1	2	No	Nehi
fhiviec1	3	Don't know	Nanuki wanyi
fhiviec1	99	missing	missing
fhiviec2	1	Health promotion	Health promotion
fhiviec2	2	Youth programmes	Youth programmes
fhiviec2	3	Condom distributions	Condom distributions
fhiviec2	4	Education in schools	Education in schools
fhiviec2	5	Women's programmes	Women's programmes
fhiviec2	6	Church group programmes	Church group programmes
fhiviec2	7	Other	Other
fhiviec2	8	Don't know	Don't know
fhiviec2	99	missing	missing
fhiviec3	1	FQML, Kalumbila mine	FQML, Kalumbila mine
fhiviec3	2	Government	Government
fhiviec3	3	NGO	NGO
fhiviec3	4	Other	Other
fhiviec3	8	Don't know	Don't know
fhiviec3	99	missing	missing
fsrh1a	2	Refuses to answer	Refuses to answer
fsrh1a	3	Don't know	Nanuki wanyi
fsrh1a	99	missing	missing
fsrh2	1	Husband	Mfum’wami
fsrh2	2	Cohabiting partner	Twashakama hamu
fsrh2	3	Boyfriend/fiancée not living with the respondent	Bwambu
fsrh2	4	Client / prosititute	Kajila kami
fsrh2	5	Unknown or casual aquaintance	Namwiluka wany
fsrh2	6	Family member	Ntang’a yami
fsrh2	7	Other	Amakwawu
fsrh2	8	Refuses to answer	Refuses to answer
fsrh2	9	Don't know	Nanuki wanyi
fsrh2	99	missing	missing
fsrh3	1	Yes	Eng’a
fsrh3	2	No	Nehi
fsrh3	3	Refuses to answer	Nanuki wanyi
fsrh3	99	missing	missing
fsrh4	1	Wanted to prevent a sexually transmitted disease	Nakeng’eli kukang’esha yikatu
fsrh4	2	Wanted to prevent pregnancy	Nakeng’eli kukang’esha ivumu
fsrh4	3	Did not trust partner	Namukuhwelela wanyi mukwetu
fsrh4	4	Partner requested to use it	Mukwetu walombeli
fsrh4	5	Refuses to answer	Refuses to answer
fsrh4	99	missing	missing
fsrh5	1	Not available	Kwosi
fsrh5	2	Partner objected	Bwambu dami wakanini
fsrh5	3	Not necessary	Yatela wanyi
fsrh5	4	Too expensive	Wuseya waswezha
fsrh5	5	Dislike condoms	Nayikeng’a wanyi
fsrh5	6	Did not think of it	Natong’jokeli wanyi
fsrh5	7	Refuses to answer	Refuses to answer
fsrh5	99	missing	missing
fsrh6	1	Yes	Eng’a
fsrh6	2	No	Nehi
fsrh6	3	Refuses to answer	Nanuki wanyi
fsrh6	99	missing	missing
fsrh7	1	Yes	Eng’a
fsrh7	2	No	Nehi
fsrh7	3	Refuses to answer	Nanuki wanyi
fsrh7	99	missing	missing
fsrh8	1	Yes	Eng’a
fsrh8	2	No	Nehi
fsrh8	3	Refuses to answer	Nanuki wanyi
fsrh8	99	missing	missing
fsrh9	1	Yes	Eng’a
fsrh9	2	No	Nehi
fsrh9	3	Not sure	Nanuki wanyi
fsrh9	99	missing	missing
fsrh10	1	Yes	Eng’a
fsrh10	2	No	Nehi
fsrh10	99	missing	missing
fsrh11	1	Health facility / post	Health facility / post
fsrh11	2	Kalumbila mine health promotion	Kalumbila mine health promotion
fsrh11	3	Pharmacy	Pharmacy
fsrh11	4	NGO	NGO
fsrh11	5	Shop, kiosk, market	Shop, kiosk, market
fsrh11	6	VCT centre	VCT centre
fsrh11	7	Bar, guest house, hotel	Bar, guest house, hotel
fsrh11	8	Friends, neighbours, relatives	Friends, neighbours, relatives
fsrh11	9	Other	Other
fsrh11	99	missing	missing
fsrh12	1	Yes	Eng’a
fsrh12	2	No	Nehi
fsrh12	99	missing	missing
fsrh13	1	Yes	Eng’a
fsrh13	2	No	Nehi
fsrh13	99	missing	missing
frtb1	1	Yes	Eng’a
frtb1	2	No	Nehi
frtb1	3	Don't remember	Nanuki wanyi
frtb1	99	missing	missing
frtb2	1	Yes	Eng’a
frtb2	2	No	Nehi
frtb2	3	Don't remember	Nanuki wanyi
frtb2	99	missing	missing
frtb3b	3	Don't remember	Nanuki wanyi
frtb3b	99	missing	missing
frtb4	1	Yes	Eng’a
frtb4	2	No	Nehi
frtb4	3	Don't remember	Nanuki wanyi
frtb4	99	missing	missing
frtb5	1	Yes	Eng’a
frtb5	2	No	Nehi
frtb5	3	Don't remember	Nanuki wanyi
frtb5	99	missing	missing
frtb6	1	Yes	Eng’a
frtb6	2	No	Nehi
frtb6	99	missing	missing
frtb7	1	Through air when a person coughs / sneezes	Kuhitila mumpepela neyi umu unakukohola
frtb7	2	Through handshakes	Kuhitila kudimusha kumakasa
frtb7	3	Through sharing utensils/ dishes	Hakuzatisha yeng’a yimu
frtb7	4	Through mosquito bites	Hakuyisuma kunweneni
frtb7	5	Through touching items in public places (doorknobs and similar)	Mukukwatakwata Yuma yoyimu (doorknobs and similar)
frtb7	6	Through sexual contact	Kuhitila muwujila
frtb7	7	Untreated colds	Muyipwembu yakubula kuuka
frtb7	8	Through food	Kuhitila muyakudya
frtb7	9	Don’t know	Neluki wanyi
frtb7	10	Other	Ikwawu
frtb7	99	missing	missing
frtb8	1	Yes	Eng’a
frtb8	2	No	Nehi
frtb8	3	Don't know	Neluki wanyi
frtb8	99	missing	missing
frtb9	1	Yes	Eng’a
frtb9	2	No	Nehi
frtb9	3	Don't know	Neluki wanyi
frtb9	99	missing	missing
fnut1	1	Yes	Eng’a
fnut1	2	No	Nehi
fnut1	99	missing	missing
fnut2	1	Yes	Eng’a
fnut2	2	No	Nehi
fnut2	99	missing	missing
fnut3	1	Disease (Malaria, HIV, etc.)	Ikatu (Malaria, HIV, etc.)
fnut3	2	Bad feeding habits	Kubula kudisha chiwahi
fnut3	3	Lack of food	Kubula yakudya
fnut3	4	Diarrhoea	Kuhitisha
fnut3	5	Bad hygiene and sanitation	Uhulu
fnut3	6	Lack of money	Kubula mali
fnut3	7	Witchcraft	Uloji
fnut3	8	Other	Ikwawu
fnut3	99	missing	missing
fsdh1	1	Yes	Eng’a
fsdh1	2	No	Nehi
fsdh1	99	missing	missing
fsdh2	1	On one day	On one day
fsdh2	2	On two days	On two days
fsdh2	3	On three days	On three days
fsdh2	4	On four days	On four days
fsdh2	5	On five days	On five days
fsdh2	6	On six days	On six days
fsdh2	7	On seven days	On seven days
fsdh2	8	I drink on special occasions	Mpinji yadimena
fsdh2	99	missing	missing
fsdh3	1	Yes	Eng’a
fsdh3	2	No	Nehi
fsdh3	99	missing	missing
fsdh6	1	Daily	Kwosi wapepelang’a mwitala
fsdh6	2	Weekly	Hefukuhefuku
fsdh6	3	Monthly	Hamulungu hamulungu
fsdh6	4	Less than monthly	Hakakwezhi
fsdh6	5	Don't know	Neluki wanyi
fsdh6	99	missing	missing
fsdh7	1	Yes	Eng’a
fsdh7	2	No	Nehi
fsdh7	99	missing	missing
fsdh8	1	Yes	Eng’a
fsdh8	2	No	Nehi
fsdh8	99	missing	missing
fsdh9a	1	Yes	Eng’a
fsdh9a	2	No	Nehi
fsdh9a	99	missing	missing
fsdh9b	1	Yes	Eng’a
fsdh9b	2	No	Nehi
fsdh9b	99	missing	missing
fsdh9c	1	Yes	Eng’a
fsdh9c	2	No	Nehi
fsdh9c	99	missing	missing
fsdh9d	1	Yes	Eng’a
fsdh9d	2	No	Nehi
fsdh9d	99	missing	missing
fsdh9e	1	Yes	Eng’a
fsdh9e	2	No	Nehi
fsdh9e	99	missing	missing
fsdh10	1	Yes, once or few times	Eng’a, mpinji imu,hela mapampa antesha
fsdh10	2	Yes, several times	Eng’a mapampa kakavulu
fsdh10	3	No	Nehi
fsdh10	99	missing	missing
fsdh11	1	Yes	Eng’a
fsdh11	2	No	Nehi
fsdh11	3	Somewhat	Somewhat
fsdh11	4	Don't know	Neluki wanyi
fsdh11	99	missing	missing
fsdh12	1	Very good	Nankashi
fsdh12	2	Good	Chachiwahi
fsdh12	3	Fair	Chantesha
fsdh12	4	Poor	Wakola wanyi
fsdh12	99	missing	missing
fsdh13b	2	Don't know	Neluki wanyi
fsdh13b	99	missing	missing
fnoise1	1	Yes	Eng’a
fnoise1	2	No	Nehi
fnoise1	99	missing	missing
fnoise2	1	General community noise	Mapumba awantu
fnoise2	2	Noise from the mine	Yivumina yaku mine
fnoise2	3	Noise from the road	Yivumina yafumang’a ku mukwakwa
fnoise2	4	Other	Ikwawu
fnoise2	99	missing	missing
fair1	1	Yes	Eng’a
fair1	2	No	Nehi
fair1	99	missing	missing
fair2	1	Bad smells	Ivumba datama
fair2	2	Smoke	Wishi
fair2	3	Dust	Lunkung’u
fair2	4	Other	Ikwawu
fair2	99	missing	missing
ws2	1	Yes, collected and labelled	Yes, collected and labelled
ws2	2	Not required to collect in this household	Not required to collect in this household
ws2	3	Was required but was not possible	Was required but was not possible
man	1	Yes	Eng’a
man	2	No	Nehi
agem2	88	unknown	unknown
agem2	99	missing	missing
maritalm	1	Married	Nasumbuka
maritalm	2	Living in a partnership, not married	Twashakama ho hamu
maritalm	3	Single (never married)	Hinasumbukaku(never married)
maritalm	4	Divorced	wadiseng’adehi
maritalm	5	Separated	Twadambula
maritalm	6	Widow	Ntuluwa
maritalm	88	unknown	unknown
maritalm	99	missing	missing
edum	1	None / Didn't attend school	Nayili wanyi kushikola
edum	2	Pre-primary school	Pre-primary school
edum	3	Primary incomplete	Primary incomplete
edum	4	Primary complete	Primary complete
edum	5	Secondary incomplete	Secondary incomplete
edum	6	Secondary complete	Secondary complete
edum	7	Post secondary	Post secondary
edum	8	University	University
edum	88	unknown	unknown
edum	99	missing	missing
occupm	1	I currently do not work (no principal activity)	Nazatang’a wanyi (no principal activity)
occupm	2	Agriculture (farming, livestock)	Agriculture (farming, livestock)
occupm	3	Mining company: Kalumbila	Mining company: Kalumbila / FQML
occupm	4	Mining company: Kansanshi	Mining company: Kansanshi
occupm	5	Mining company: Lumwana	Mining company: Lumwana
occupm	6	Mining company: Other	Mining company: Other
occupm	7	Contractor Omega	Contractor Omega
occupm	8	Contractor Titan	Contractor Titan
occupm	9	Contractor Quattro	Contractor Quattro
occupm	10	Contractor Kalpatru	Contractor Kalpatru
occupm	11	Contractor Sandon	Contractor Sandon
occupm	12	Contractor Orica	Contractor Orica
occupm	13	Government employee	Government employee
occupm	14	NGO employee	NGO employee
occupm	15	Sales and services (incl. small businesses)	Sales and services (incl. small businesses)
occupm	16	Manual labour	Manual labour
occupm	17	Other	Ikwawu
occupm	88	unknown	unknown
occupm	99	missing	missing
mint1	1	Yes	Eng’a
mint1	2	No	Nehi
mint2	1	Yes	Eng’a
mint2	2	No	Nehi
mint3	1	Yes	Eng’a
mint3	2	No	Nehi
mint4	1	Yes	Eng’a
mint4	2	No	Nehi
mint5	1	Yes	Eng’a
mint5	2	No	Nehi
mint6	1	Yes	Eng’a
mint6	2	No	Nehi
mint7	1	Yes	Eng’a
mint7	2	No	Nehi
mint8	1	Yes	Eng’a
mint8	2	No	Nehi
mint9	1	Yes	Eng’a
mint9	2	No	Nehi
mint10	1	Yes	Eng’a
mint10	2	No	Nehi
mimp	1	Kalumbila mine / FQM	Kalumbila mine / FQM
mimp	2	Government, Ministry of Health	Government, Ministry of Health
mimp	3	NGO	NGO
mimp	4	Other	Other
mimp	88	unknown	unknown
mimp	99	missing	missing
mmalaria1	1	Yes	Eng’a
mmalaria1	2	No	Nehi
mmalaria1	99	missing	missing
mmalaria2	1	Working in the sun	Kushakama hamwaana
mmalaria2	2	Being in the rain	Kuzowa namvula
mmalaria2	3	When it’s cold	Nsang’u yamashika
mmalaria2	4	Fly bites	Kuyisuma kudi anzhinzhi
mmalaria2	5	Eating mangoes	Kudya zhimbuma
mmalaria2	6	Mosquito bites	Kuyisuma kudi anweneni
mmalaria2	7	Bites of other insects	Kuyisuma kudi atububu
mmalaria2	8	Drinking milk	Kunwa mayeli
mmalaria2	9	Eating sugary food	Kudya yakudya yatowala
mmalaria2	10	Drinking beer	Kunwa walwa
mmalaria2	11	Dirty environment	Ilung’a da mazhilu
mmalaria2	12	Drinking dirty water	Kunwa menzhi amajilu
mmalaria2	13	From another person that has malaria	Kufuma kudi antu akata mashika (malaria)
mmalaria2	14	Don’t know	Neluki wanyi
mmalaria2	15	Other	Ikwawu
mmalaria2	88	unknown	unknown
mmalaria2	99	missing	missing
mmalaria3	1	Sleeping under a mosquito net	Kuzatisha nyishikitena
mmalaria3	2	Avoiding mosquito bites	Kukang’esha anweneni kuyisuma
mmalaria3	3	Taking medicine	Kunwa yitumbu
mmalaria3	4	Using coils	Kuzatisha yitumbu yakochela mwitala
mmalaria3	5	Using insecticide spray	Kusansa yitumbu mumatala
mmalaria3	6	Avoid getting cold	Kutemuka mashika
mmalaria3	7	Avoid being in the sun too long	Kushakama muulelu
mmalaria3	8	Keep the surrounds of the house clean	Kuwahisha hamatala
mmalaria3	9	Drinking clean water	Kunwa menzhi amawahi
mmalaria3	10	Close windows and doors	Kwenzela yisu ni mawindow
mmalaria3	11	Use mosquito repellents	Kuzatisha yitumbu yakuhang’a nweneni
mmalaria3	12	Use traditional plants	Kuzatisha yitumbu ya nshinkulu
mmalaria3	14	Don’t know	Neluki wanyi
mmalaria3	15	Other	Ikwawu
mmalaria3	88	unknown	unknown
mmalaria3	99	missing	missing
mmalaria4	1	Local clinic (public)	Chipateli (public)
mmalaria4	2	Other public health facility	Other public health facility
mmalaria4	3	Private health facility	Chipateli chawantu (private)
mmalaria4	4	Missionary health facility	Chipateli chawa Missionary
mmalaria4	5	KML mobile health unit	KML mobile health unit
mmalaria4	6	KML workplace health facility	KML workplace health facility
mmalaria4	7	Pharmacy	Pharmacy
mmalaria4	8	Malaria agent	Malaria agent
mmalaria4	9	Shop, kiosk, market	Shop, kiosk, market
mmalaria4	10	Self-medication with herbal remedy	Namwinkeli itumbu kwitala
mmalaria4	11	Parents, friends	Amvwali/mabwambu
mmalaria4	11	Traditional healer	Mukwakuka
mmalaria4	12	Church, mosque, temple (clerical)	Church, mosque, temple (clerical)
mmalaria4	13	Didn't do anything	Kwosi kunayili
mmalaria4	14	Other public health facility	Ikwawu
mmalaria4	88	unknown	unknown
mmalaria4	99	missing	missing
mmalaria5	1	Within 24 hours	Mukachi ka maora 24
mmalaria5	2	2-3 days	Mafuku ayedi hela asatu (2-3 days)
mmalaria5	3	4-6 days	Mafuku awana hela atanu nadimu (4- 6 days )
mmalaria5	4	7 days or more	mafuku atanu nayedi( 7 days or more )
mmalaria5	5	Don't know, don't remember	Nanuki wanyi/Neluki wanyi
mmalaria5	99	missing	missing
mmalaria6	1	Blood test (microscopy or rapid diagnostic test (RDT))	Kupima mashi
mmalaria6	2	Based on symptoms	Kulondela yinjikjilu
mmalaria6	3	Don't know, don't remember	Nanuki wanyi/Neluki wanyi
mmalaria6	99	missing	missing
mmalaria7	1	Coartem	Coartem
mmalaria7	2	Fansidar	Fansidar
mmalaria7	3	Chloroqine	Chloroqine
mmalaria7	4	Quinine	Quinine
mmalaria7	5	Panadol	Panadol
mmalaria7	6	Other	Other
mmalaria7	7	Don't know, don't remember	Nanuki wanyi/Neluki wanyi
mmalaria7	99	missing	missing
mmalaria8	1	Yes	Eng’a
mmalaria8	2	No	Nehi
mmalaria8	3	Don't remember	Neluki wanyi
mmalaria8	99	missing	missing
mmalaria9	1	Reduce the number of mosquitoes in the house	Reduce the number of mosquitoes in the house
mmalaria9	2	Kills other insects in the house	Kills other insects in the house
mmalaria9	3	Less malaria	Less malaria
mmalaria9	4	Other	Other
mmalaria9	99	missing	missing
mmalaria10	1	Yes	Eng’a
mmalaria10	2	No	Nehi
mmalaria10	3	Don't remember	Neluki wanyi
mmalaria10	99	missing	missing
mmalaria11	1	Bad smell	Bad smell
mmalaria11	2	Inconvenience	Inconvenience
mmalaria11	3	Mess on the floor and in the house	Mess on the floor and in the house
mmalaria11	4	Damage to the belonging	Damage to the belonging
mmalaria11	5	Excites other insects	Excites other insects
mmalaria11	6	Spray-men's conduct	Spray-men's conduct
mmalaria11	7	Discoloouring of walls	Discoloouring of walls
mmalaria11	8	Other	Other
mmalaria11	99	missing	missing
mhiv1	1	Yes	Eng’a
mhiv1	2	No	Nehi
mhiv1	99	missing	missing
mhiv2	1	Yes	Eng’a
mhiv2	2	No	Nehi
mhiv2	99	missing	missing
mhivprev1	1	Yes	Eng’a
mhivprev1	2	No	Nehi
mhivprev1	3	Don't know	Nanuki wanyi
mhivprev1	99	missing	missing
mhivprev2	1	Yes	Eng’a
mhivprev2	2	No	Nehi
mhivprev2	3	Don't know	Nanuki wanyi
mhivprev2	99	missing	missing
mhivprev3	1	Yes	Eng’a
mhivprev3	2	No	Nehi
mhivprev3	3	Don't know	Nanuki wanyi
mhivprev3	99	missing	missing
mhivprev4	1	Yes	Eng’a
mhivprev4	2	No	Nehi
mhivprev4	3	Don't know	Nanuki wanyi
mhivprev4	99	missing	missing
mhivprev5	1	Yes	Eng’a
mhivprev5	2	No	Nehi
mhivprev5	3	Don't know	Nanuki wanyi
mhivprev5	99	missing	missing
mhivprev6	1	Yes	Eng’a
mhivprev6	2	No	Nehi
mhivprev6	3	Don't know	Nanuki wanyi
mhivprev6	99	missing	missing
mhivprev7	1	Yes	Eng’a
mhivprev7	2	No	Nehi
mhivprev7	3	Don't know	Nanuki wanyi
mhivprev7	99	missing	missing
mmtct1	1	Yes	Eng’a
mmtct1	2	No	Nehi
mmtct1	3	Don't know	Nanuki wanyi
mmtct1	99	missing	missing
mmtct2	1	Yes	Eng’a
mmtct2	2	No	Nehi
mmtct2	3	Don't know	Nanuki wanyi
mmtct2	99	missing	missing
mmtct3	1	Yes	Eng’a
mmtct3	2	No	Nehi
mmtct3	3	Don't know	Nanuki wanyi
mmtct3	99	missing	missing
mhivprev8	1	Yes	Eng’a
mhivprev8	2	No	Nehi
mhivprev8	3	Don't know	Nanuki wanyi
mhivprev8	99	missing	missing
mhiva1	1	Yes	Eng’a
mhiva1	2	No	Nehi
mhiva1	3	Don't know	Nanuki wanyi
mhiva1	99	missing	missing
mhiva2	1	Yes	Eng’a
mhiva2	2	No	Nehi
mhiva2	3	Don't know	Nanuki wanyi
mhiva2	99	missing	missing
mhiva3	1	Yes	Eng’a
mhiva3	2	No	Nehi
mhiva3	3	Don't know	Nanuki wanyi
mhiva3	99	missing	missing
mvct1	1	Yes	Eng’a
mvct1	2	No	Nehi
mvct1	3	Refuses to answer	Nanuki wanyi
mvct1	99	missing	missing
mvct2	1	Local clinic (public)	Chipateli (public)
mvct2	2	Other public health facility	Other public health facility
mvct2	3	Private health facility	Chipateli chawantu (private)
mvct2	4	Missionary health facility	Chipateli chawa Missionary
mvct2	5	KML mobile health unit	KML mobile health unit
mvct2	6	KML workplace health facility	KML workplace health facility
mvct2	7	Other	Ikwawu
mvct2	88	unknown	unknown
mvct2	99	missing	missing
mvct3	1	Accessibility: I cannot access a place to take a test	Accessibility: Kwosi kwakuya nakupimisha
mvct3	2	Acceptability: I do not like the testing service	Acceptability: Nakeng’a kupimisha wanyi
mvct3	3	Affordability: I do not have the money for testing	Affordability: Nidi namali wanyi akufweta
mvct3	4	I’m scared of the test / to know the result	Natiyang’a woma kupimisha / to know the result
mvct3	5	I don’t need to take a test	Nachikeng’a wanyi
mvct3	6	Partner objects to testing	Mukwetu wakanishang’a
mvct3	7	Religious reasons	Religious reasons
mvct3	8	I haven’t decided yet	Kanda nitong’ojoki
mvct3	9	I don't know	Neluki wanyi
mvct3	10	Refuses to answer	Refuses to answer
mvct3	11	Other	Ikwawu
mvct3	99	missing	missing
mvct4	1	Local clinic (public)	Chipateli (public)
mvct4	2	Other public health facility	Other public health facility
mvct4	3	Private health facility	Chipateli chawantu (private)
mvct4	4	Missionary health facility	Chipateli chawa Missionary
mvct4	5	KML mobile health unit	KML mobile health unit
mvct4	6	KML workplace health facility	KML workplace health facility
mvct4	7	Pharmacy	Pharmacy
mvct4	8	Shop, kiosk, market	Shop, kiosk, market
mvct4	9	Self-medication with herbal remedy	Namwinkeli itumbu kwitala
mvct4	10	Parents, friends	Amvwali/mabwambu
mvct4	11	Traditional healer	Mukwakuka
mvct4	12	Church, mosque, temple (clerical)	Church, mosque, temple (clerical)
mvct4	13	There is nowhere to go	Kwosi kunayili
mvct4	14	Other	Ikwawu
mvct4	88	unknown	unknown
mvct4	99	missing	missing
mhiviec1	1	Yes	Eng’a
mhiviec1	2	No	Nehi
mhiviec1	3	Don't know	Nanuki wanyi
mhiviec1	99	missing	missing
mhiviec2	1	Health promotion	Health promotion
mhiviec2	2	Youth programmes	Youth programmes
mhiviec2	3	Condom distributions	Condom distributions
mhiviec2	4	Education in schools	Education in schools
mhiviec2	5	Women's programmes	Women's programmes
mhiviec2	6	Church group programmes	Church group programmes
mhiviec2	7	Other	Other
mhiviec2	8	Don't know	Don't know
mhiviec2	99	missing	missing
mhiviec3	1	FQML, Kalumbila mine	FQML, Kalumbila mine
mhiviec3	2	Government	Government
mhiviec3	3	NGO	NGO
mhiviec3	4	Other	Other
mhiviec3	8	Don't know	Don't know
mhiviec3	99	missing	missing
msrh1a	1	Has never had sexual intercourse	Has never had sexual intercourse
msrh1a	2	Refuses to answer	Refuses to answer
msrh1a	3	Don't know	Nanuki wanyi
msrh1a	99	missing	missing
msrh2	1	Husband/Wife	Mfum’wami
msrh2	2	Cohabiting partner	Twashakama hamu
msrh2	3	Boyfriend / girlfriend / fiancée not living with the respondent	Bwambu
msrh2	4	Client / prosititute	Kajila kami
msrh2	5	Unknown or casual aquaintance	Namwiluka wany
msrh2	6	Family member	Ntang’a yami
msrh2	7	Other	Amakwawu
msrh2	8	Refuses to answer	Refuses to answer
msrh2	9	Don't know	Nanuki wanyi
msrh2	99	missing	missing
msrh3	1	Yes	Eng’a
msrh3	2	No	Nehi
msrh3	3	Refuses to answer	Nanuki wanyi
msrh3	99	missing	missing
msrh4	1	Wanted to prevent a sexually transmitted disease	Nakeng’eli kukang’esha yikatu
msrh4	2	Wanted to prevent pregnancy	Nakeng’eli kukang’esha ivumu
msrh4	3	Did not trust partner	Namukuhwelela wanyi mukwetu
msrh4	4	Partner requested to use it	Mukwetu walombeli
msrh4	5	Refuses to answer	Refuses to answer
msrh4	99	missing	missing
msrh5	1	Not available	Kwosi
msrh5	2	Partner objected	Bwambu dami wakanini
msrh5	3	Not necessary	Yatela wanyi
msrh5	4	Too expensive	Wuseya waswezha
msrh5	5	Dislike condoms	Nayikeng’a wanyi
msrh5	6	Did not think of it	Natong’jokeli wanyi
msrh5	7	Refuses to answer	Refuses to answer
msrh5	99	missing	missing
msrh6	1	Yes	Eng’a
msrh6	2	No	Nehi
msrh6	3	Refuses to answer	Nanuki wanyi
msrh6	99	missing	missing
msrh7	1	Yes	Eng’a
msrh7	2	No	Nehi
msrh7	3	Refuses to answer	Nanuki wanyi
msrh7	99	missing	missing
msrh8	1	Yes	Eng’a
msrh8	2	No	Nehi
msrh8	3	Refuses to answer	Nanuki wanyi
msrh8	99	missing	missing
msrh9	1	Yes	Eng’a
msrh9	2	No	Nehi
msrh9	3	Not sure	Nanuki wanyi
msrh9	99	missing	missing
msrh10	1	Yes	Eng’a
msrh10	2	No	Nehi
msrh10	99	missing	missing
msrh11	1	Health facility / post	Health facility / post
msrh11	2	Kalumbila mine health promotion	Kalumbila mine health promotion
msrh11	3	Pharmacy	Pharmacy
msrh11	4	NGO	NGO
msrh11	5	Shop, kiosk, market	Shop, kiosk, market
msrh11	6	VCT centre	VCT centre
msrh11	7	Bar, guest house, hotel	Bar, guest house, hotel
msrh11	8	Friends, neighbours, relatives	Friends, neighbours, relatives
msrh11	9	Other	Other
msrh11	99	missing	missing
msrh12	1	Yes	Eng’a
msrh12	2	No	Nehi
msrh12	99	missing	missing
msrh13	1	Yes	Eng’a
msrh13	2	No	Nehi
msrh13	99	missing	missing
mrtb1	1	Yes	Eng’a
mrtb1	2	No	Nehi
mrtb1	3	Don't remember	Nanuki wanyi
mrtb1	99	missing	missing
mrtb2	1	Yes	Eng’a
mrtb2	2	No	Nehi
mrtb2	3	Don't remember	Nanuki wanyi
mrtb2	99	missing	missing
mrtb3b	3	Don't remember	Nanuki wanyi
mrtb3b	99	missing	missing
mrtb4	1	Yes	Eng’a
mrtb4	2	No	Nehi
mrtb4	3	Don't remember	Nanuki wanyi
mrtb4	99	missing	missing
mrtb5	1	Yes	Eng’a
mrtb5	2	No	Nehi
mrtb5	3	Don't remember	Nanuki wanyi
mrtb5	99	missing	missing
mrtb6	1	Yes	Eng’a
mrtb6	2	No	Nehi
mrtb6	99	missing	missing
mrtb7	1	Through air when a person coughs / sneezes	Kuhitila mumpepela neyi umu unakukohola
mrtb7	2	Through handshakes	Kuhitila kudimusha kumakasa
mrtb7	3	Through sharing utensils/ dishes	Hakuzatisha yeng’a yimu
mrtb7	4	Through mosquito bites	Hakuyisuma kunweneni
mrtb7	5	Through touching items in public places (doorknobs and similar)	Mukukwatakwata Yuma yoyimu (doorknobs and similar)
mrtb7	6	Through sexual contact	Kuhitila muwujila
mrtb7	7	Untreated colds	Muyipwembu yakubula kuuka
mrtb7	8	Through food	Kuhitila muyakudya
mrtb7	9	Don’t know	Neluki wanyi
mrtb7	10	Other	Ikwawu
mrtb7	99	missing	missing
mrtb8	1	Yes	Eng’a
mrtb8	2	No	Nehi
mrtb8	3	Don't know	Neluki wanyi
mrtb8	99	missing	missing
mrtb9	1	Yes	Eng’a
mrtb9	2	No	Nehi
mrtb9	3	Don't know	Neluki wanyi
mrtb9	99	missing	missing
msdh1	1	Yes	Eng’a
msdh1	2	No	Nehi
msdh1	99	missing	missing
msdh2	1	On one day	On one day
msdh2	2	On two days	On two days
msdh2	3	On three days	On three days
msdh2	4	On four days	On four days
msdh2	5	On five days	On five days
msdh2	6	On six days	On six days
msdh2	7	On seven days	On seven days
msdh2	8	I drink on special occasions	Mpinji yadimena
msdh2	99	missing	missing
msdh3	1	Yes	Eng’a
msdh3	2	No	Nehi
msdh3	99	missing	missing
msdh6	1	Daily	Kwosi wapepelang’a mwitala
msdh6	2	Weekly	Hefukuhefuku
msdh6	3	Monthly	Hamulungu hamulungu
msdh6	4	Less than monthly	Hakakwezhi
msdh6	5	Don't know	Neluki wanyi
msdh6	99	missing	missing
msdh7	1	Yes	Eng’a
msdh7	2	No	Nehi
msdh7	99	missing	missing
msdh8	1	Yes	Eng’a
msdh8	2	No	Nehi
msdh8	99	missing	missing
msdh9a	1	Yes	Eng’a
msdh9a	2	No	Nehi
msdh9a	99	missing	missing
msdh9b	1	Yes	Eng’a
msdh9b	2	No	Nehi
msdh9b	99	missing	missing
msdh9c	1	Yes	Eng’a
msdh9c	2	No	Nehi
msdh9c	99	missing	missing
msdh9d	1	Yes	Eng’a
msdh9d	2	No	Nehi
msdh9d	99	missing	missing
msdh9e	1	Yes	Eng’a
msdh9e	2	No	Nehi
msdh9e	99	missing	missing
msdh10	1	Yes, once or few times	Eng’a, mpinji imu,hela mapampa antesha
msdh10	2	Yes, several times	Eng’a mapampa kakavulu
msdh10	3	No	Nehi
msdh10	99	missing	missing
msdh11	1	Yes	Eng’a
msdh11	2	No	Nehi
msdh11	3	Somewhat	Somewhat
msdh11	4	Don't know	Neluki wanyi
msdh11	99	missing	missing
msdh12	1	Very good	Nankashi
msdh12	2	Good	Chachiwahi
msdh12	3	Fair	Chantesha
msdh12	4	Poor	Wakola wanyi
msdh12	99	missing	missing
msdh13b	2	Don't know	Neluki wanyi
msdh13b	99	missing	missing
mnoise1	1	Yes	Eng’a
mnoise1	2	No	Nehi
mnoise1	99	missing	missing
mnoise2	1	General community noise	Mapumba awantu
mnoise2	2	Noise from the mine	Yivumina yaku mine
mnoise2	3	Noise from the road	Yivumina yafumang’a ku mukwakwa
mnoise2	4	Other	Ikwawu
mnoise2	99	missing	missing
mair1	1	Yes	Eng’a
mair1	2	No	Nehi
mair1	99	missing	missing
mair2	1	Bad smells	Ivumba datama
mair2	2	Smoke	Wishi
mair2	3	Dust	Lunkung’u
mair2	4	Other	Ikwawu
mair2	99	missing	missing

## Sheet: settings
form_title	form_id	public_key	submission_url	default_language
Questionnaire_Trident_Project_final4	Questionnaire_Trident_Project_final4
